# Shared loci of telomere length with brain morphology, and pleiotropy in transcriptomic and epigenomic profiles of brain

**Gita A Pathak, PhD<sup>1,2</sup>, Frank R Wendt, PhD<sup>1,2</sup>, Daniel F Levey, PhD<sup>1,2</sup>, Adam P Mecca, MD, PhD<sup>1,3</sup>, Christopher H van Dyck, MD<sup>1,3,4,5</sup>, Joel Gelernter, MD<sup>1,2</sup>, Renato Polimanti, PhD<sup>1,2</sup> ✉**

<sup>1</sup>Department of Psychiatry, Yale School of Medicine, Yale University, New Haven, CT USA

<sup>2</sup>Veteran Affairs Connecticut Healthcare System, West Haven, CT USA

<sup>3</sup>Alzheimer's Disease Research Unit, Yale University School of Medicine, New Haven, CT USA

<sup>4</sup>Department of Neuroscience, Yale University School of Medicine, New Haven, CT USA

<sup>5</sup>Department of Neurology, Yale University School of Medicine, New Haven, CT USA

✉ Corresponding author: Renato Polimanti, PhD

E-mail: [renato.polimanti@yale.edu](mailto:renato.polimanti@yale.edu)

Address: VA CT 116A2, 950 Campbell Avenue

West Haven, CT, 06516, USA

Phone: +1 (203) 937-5711 *ext.5745*

Fax: +1 (203) 937-3897

**Running Title:** Shared genetic relationship between telomere length and brain

## ABSTRACT

Premature shortening of telomere length is observed in neuropsychiatric disorders. We tested genetic colocalization of seven and nine leukocyte telomere length (LTL) loci in two ancestry groups, European (EUR) and East-Asian (EAS), respectively (total n=60,601) with brain morphology measures for 101 region-of-interests (ROI) (n=21,821). The posterior probability (>90%) was observed for 'fourth ventricle', 'gray matter' and 'cerebellar vermal lobules I-IV' volumes. We found regulatory genes ( $p \leq 2.47 \times 10^{-6}$ ) by integrating transcriptomic (EAS=4;EUR=5) and methylation data (EUR=17; EAS=4) of brain tissues using Summary-based Mendelian Randomization (SMR). The LTL SNP associations were tested for brain-based chromatin profiles using H-MAGMA (EUR=50; EAS=97;  $p \leq 1.02 \times 10^{-6}$ ). Pathway enrichment of tissue-specific genes highlighted calcium ion transport (fetal brain) and G2/M cell cycle transition (adult brain). This study provides evidence that previously reported LTL associations with neuropsychiatric disorders could be related to a shared genetic relationship between LTL and brain structural and regulatory traits.

**Keywords:** telomere, transcriptomics, epigenetics, brain, chromatin, neuropsychiatric, fourth ventricle

---

## 2 1 INTRODUCTION

3  
4  
5  
6  
7  
8  
9  
10  
11  
12  
13  
14  
15  
16  
17  
18  
19  
20  
21  
22  
23  
24  
25  
26  
27  
28  
29  
30  
31  
32  
33  
34  
35  
36  
37  
38  
39  
40  
41  
42  
43  
44  
45  
46  
47  
48  
49  
50  
51  
52  
53  
54  
55  
56  
57  
58  
59  
60  
61  
62  
63  
64  
65  
66  
67  
68  
69  
70  
71  
72  
73  
74  
75  
76  
77  
78  
79  
80  
81  
82  
83  
84  
85  
86  
87  
88  
89  
90  
91  
92  
93  
94  
95  
96  
97  
98  
99  
100  
101  
102  
103  
104  
105  
106  
107  
108  
109  
110  
111  
112  
113  
114  
115  
116  
117  
118  
119  
120  
121  
122  
123  
124  
125  
126  
127  
128  
129  
130  
131  
132  
133  
134  
135  
136  
137  
138  
139  
140  
141  
142  
143  
144  
145  
146  
147  
148  
149  
150  
151  
152  
153  
154  
155  
156  
157  
158  
159  
160  
161  
162  
163  
164  
165  
166  
167  
168  
169  
170  
171  
172  
173  
174  
175  
176  
177  
178  
179  
180  
181  
182  
183  
184  
185  
186  
187  
188  
189  
190  
191  
192  
193  
194  
195  
196  
197  
198  
199  
200  
201  
202  
203  
204  
205  
206  
207  
208  
209  
210  
211  
212  
213  
214  
215  
216  
217  
218  
219  
220  
221  
222  
223  
224  
225  
226  
227  
228  
229  
230  
231  
232  
233  
234  
235  
236  
237  
238  
239  
240  
241  
242  
243  
244  
245  
246  
247  
248  
249  
250  
251  
252  
253  
254  
255  
256  
257  
258  
259  
260  
261  
262  
263  
264  
265  
266  
267  
268  
269  
270  
271  
272  
273  
274  
275  
276  
277  
278  
279  
280  
281  
282  
283  
284  
285  
286  
287  
288  
289  
290  
291  
292  
293  
294  
295  
296  
297  
298  
299  
300  
301  
302  
303  
304  
305  
306  
307  
308  
309  
310  
311  
312  
313  
314  
315  
316  
317  
318  
319  
320  
321  
322  
323  
324  
325  
326  
327  
328  
329  
330  
331  
332  
333  
334  
335  
336  
337  
338  
339  
340  
341  
342  
343  
344  
345  
346  
347  
348  
349  
350  
351  
352  
353  
354  
355  
356  
357  
358  
359  
360  
361  
362  
363  
364  
365  
366  
367  
368  
369  
370  
371  
372  
373  
374  
375  
376  
377  
378  
379  
380  
381  
382  
383  
384  
385  
386  
387  
388  
389  
390  
391  
392  
393  
394  
395  
396  
397  
398  
399  
400  
401  
402  
403  
404  
405  
406  
407  
408  
409  
410  
411  
412  
413  
414  
415  
416  
417  
418  
419  
420  
421  
422  
423  
424  
425  
426  
427  
428  
429  
430  
431  
432  
433  
434  
435  
436  
437  
438  
439  
440  
441  
442  
443  
444  
445  
446  
447  
448  
449  
450  
451  
452  
453  
454  
455  
456  
457  
458  
459  
460  
461  
462  
463  
464  
465  
466  
467  
468  
469  
470  
471  
472  
473  
474  
475  
476  
477  
478  
479  
480  
481  
482  
483  
484  
485  
486  
487  
488  
489  
490  
491  
492  
493  
494  
495  
496  
497  
498  
499  
500  
501  
502  
503  
504  
505  
506  
507  
508  
509  
510  
511  
512  
513  
514  
515  
516  
517  
518  
519  
520  
521  
522  
523  
524  
525  
526  
527  
528  
529  
530  
531  
532  
533  
534  
535  
536  
537  
538  
539  
540  
541  
542  
543  
544  
545  
546  
547  
548  
549  
550  
551  
552  
553  
554  
555  
556  
557  
558  
559  
560  
561  
562  
563  
564  
565  
566  
567  
568  
569  
570  
571  
572  
573  
574  
575  
576  
577  
578  
579  
580  
581  
582  
583  
584  
585  
586  
587  
588  
589  
590  
591  
592  
593  
594  
595  
596  
597  
598  
599  
600  
601  
602  
603  
604  
605  
606  
607  
608  
609  
610  
611  
612  
613  
614  
615  
616  
617  
618  
619  
620  
621  
622  
623  
624  
625  
626  
627  
628  
629  
630  
631  
632  
633  
634  
635  
636  
637  
638  
639  
640  
641  
642  
643  
644  
645  
646  
647  
648  
649  
650  
651  
652  
653  
654  
655  
656  
657  
658  
659  
660  
661  
662  
663  
664  
665  
666  
667  
668  
669  
670  
671  
672  
673  
674  
675  
676  
677  
678  
679  
680  
681  
682  
683  
684  
685  
686  
687  
688  
689  
690  
691  
692  
693  
694  
695  
696  
697  
698  
699  
700  
701  
702  
703  
704  
705  
706  
707  
708  
709  
710  
711  
712  
713  
714  
715  
716  
717  
718  
719  
720  
721  
722  
723  
724  
725  
726  
727  
728  
729  
730  
731  
732  
733  
734  
735  
736  
737  
738  
739  
740  
741  
742  
743  
744  
745  
746  
747  
748  
749  
750  
751  
752  
753  
754  
755  
756  
757  
758  
759  
760  
761  
762  
763  
764  
765  
766  
767  
768  
769  
770  
771  
772  
773  
774  
775  
776  
777  
778  
779  
780  
781  
782  
783  
784  
785  
786  
787  
788  
789  
790  
791  
792  
793  
794  
795  
796  
797  
798  
799  
800  
801  
802  
803  
804  
805  
806  
807  
808  
809  
810  
811  
812  
813  
814  
815  
816  
817  
818  
819  
820  
821  
822  
823  
824  
825  
826  
827  
828  
829  
830  
831  
832  
833  
834  
835  
836  
837  
838  
839  
840  
841  
842  
843  
844  
845  
846  
847  
848  
849  
850  
851  
852  
853  
854  
855  
856  
857  
858  
859  
860  
861  
862  
863  
864  
865  
866  
867  
868  
869  
870  
871  
872  
873  
874  
875  
876  
877  
878  
879  
880  
881  
882  
883  
884  
885  
886  
887  
888  
889  
890  
891  
892  
893  
894  
895  
896  
897  
898  
899  
900  
901  
902  
903  
904  
905  
906  
907  
908  
909  
910  
911  
912  
913  
914  
915  
916  
917  
918  
919  
920  
921  
922  
923  
924  
925  
926  
927  
928  
929  
930  
931  
932  
933  
934  
935  
936  
937  
938  
939  
940  
941  
942  
943  
944  
945  
946  
947  
948  
949  
950  
951  
952  
953  
954  
955  
956  
957  
958  
959  
960  
961  
962  
963  
964  
965  
966  
967  
968  
969  
970  
971  
972  
973  
974  
975  
976  
977  
978  
979  
980  
981  
982  
983  
984  
985  
986  
987  
988  
989  
990  
991  
992  
993  
994  
995  
996  
997  
998  
999  
1000

Telomeres are short sequences of "TTAGGG" at the 3' end of the chromosomes. With replicating cell cycles, telomere length continues to shorten and represents the mitotic history of the cell. The telomere length shortens (i.e., the number of TTAGGG repeat motifs decreases) over chronological age (i.e., actual age of the person) (Koliada et al., 2015). Additionally, under the effects of influences such as, inflammation, oxidative stress, elevated hormone levels under stress or pathological conditions, telomere length can shorten prematurely (Vakonaki et al., 2018). Perturbations in telomere lengthening enzymes such as telomerase reverse transcriptase (*TERT*) and telomerase RNA component result in cellular damage and genomic instability, further accelerating damage to physiological processes termed cellular aging (Bär and Blasco, 2016).

Psychiatric traits such as major depressive disorder (MDD), schizophrenia, anxiety, bipolar disorder (Muneer and Minhas, 2019), and neurodegenerative disorders (e.g., Alzheimer's disease) have documented associations with shortened leukocyte telomere length (LTL)(Forero et al., 2016). Childhood anxiety and adversity contribute to lifetime diagnosis of mood disorders(McLaughlin et al., 2012) such as MDD(Kaczmarczyk et al., 2018; Wang et al., 2017), bipolar disorder(Aas et al., 2016) , schizophrenia(Aas et al., 2019), and posttraumatic stress disorder(McLaughlin et al., 2017). Childhood adversities and chronic illness are correlated with shorter leukocyte telomere length in individuals with anxiety diagnosis (Kananen et al., 2010). In addition to brain-based disorders, LTL is associated with brain morphology of such structures as hippocampal, temporal, and cingulate region volumes among others (King et al., 2014). Teenagers with MDD were reported to have shorter telomeres and smaller right hippocampal volume (Henje Blom et al., 2015). A longitudinal study measuring the effects of various mental training modules (to improve cognition and behavioral traits) reported a significant association between reduced telomere length and thinning of the cortex structure highlighting

28 neuronal plasticity variation between telomere and certain brain structures(Puhlmann et  
al., 2019). The association of telomere length variability with psychiatric disorders has  
30 led to the hypothesis of accelerated cellular or biological aging mediating physiological  
deterioration (Aas et al., 2019).

32 Telomerase mediates cell differentiation and is highly expressed in neural stem and  
progenitor cells, and declines with increasing age (Liu et al., 2018). Dysfunction in  
34 telomerase impairs neural circuitry in the hippocampus, which is one of many factors  
that leads to memory decline (Zhou et al., 2017). The expression of *TERT* is lower in  
36 astrocytes than oligodendrocytes (Szebeni et al., 2014), and telomere attrition induces  
cellular senescence of astrocytes leading to neurological dysregulation (Cohen and  
38 Torres, 2019). Telomere shortening disrupts the neuronal differentiation cell cycle  
(Ferrón et al., 2009).Neurogenesis in both adult and fetal tissue is influenced by  
40 functioning telomerase and interaction with sheltrin complex which protects the  
telomeric caps (i.e., prevents reduction in telomeric TTAGGG repeat number) (Lobanova  
42 et al., 2017). Even though telomere length is generally expected to be associated with  
age-related disorders, telomere length attrition can be influenced by maternal and  
44 intrauterine stressors during fetal development exhibiting its effects during an  
individual's life course (Edlow et al., 2019).

46 Twin-based genetic heritability of LTL is estimated at around 30-60% (Dorajoo et al.,  
2019). Genome-wide association studies (GWAS) measure relative differences in  
48 frequencies of genome-wide single nucleotide polymorphisms (SNPs) for a trait of  
interest. A relatively high proportion of SNP associations are found in non-coding  
50 regions and may have tissue specific regulatory effects in local or distant regions (Giral  
et al., 2018). Tissue- and cell-type specific regulatory effects may be investigated by  
52 comparing the association of SNPs with gene expression (termed expression  
quantitative trait loci, eQTL) and methylation levels of CpG (cytosine-phosphate-

54 guanosine) sites termed methylation QTL (mQTL) (T. Zhao et al., 2019). Leveraging large  
studies with genetic, transcriptomic, and epigenetic data allows us to identify putative  
56 tissue and cell-specific regulatory effects of trait-specific SNPs. To our knowledge, no  
study has investigated shared causal loci for brain morphology and brain tissue based  
58 multi-omic regulatory consequences of telomere length SNP associations.

In this study we used large scale LTL GWAS of 37,505 European and 23,096 Chinese  
60 individuals ( $n_{\text{total}}=60,601$ ) (Dorajoo et al., 2019) to identify a) LTL causal loci shared with  
brain volume measures, b) transcriptomic and epigenetic regulatory effects, and c)  
62 chromatin profiles in brain tissue (Figure 1). First we analyzed whether LTL risk loci are  
shared with 101 T1-MRI (magnetic resonance imaging weighted for longitudinal  
64 relaxation time) brain region-of-interest phenotypes ( $n=21,821$ ) (B. Zhao et al., 2019).  
Then, we integrated meta-analyzed mQTL (Qi et al., 2018) ( $n = 1,160$ ) and eQTL  
66 associations from different regions of the brain ( $n = 1,194$ ) obtained from Genotype-  
Tissue Expression GTEx (GTEx Consortium et al., 2017), CommonMind Consortium (CMC)  
68 (Fromer et al., 2016), the Religious Orders Study and the Memory and Aging Project  
(ROSMAP) (Ng et al., 2017) and prefrontal cortex-based eQTL ( $n = 1,387$ ) of  
70 PsychENCODE consortia (Gandal et al., 2018) were used to conduct gene based  
association study for LTL using Summary-based Mendelian Randomization (Zhu et al.,  
72 2016). Chromatin profiles from human brain tissue of two developmental stages – fetal  
and adult, and two cell types – astrocytes and neurons were investigated to identify  
74 genes specific to tissue and cell types using H-MAGMA (Hi-C-coupled multimarker  
analysis of genomic annotation) (Sey et al., 2020).

76

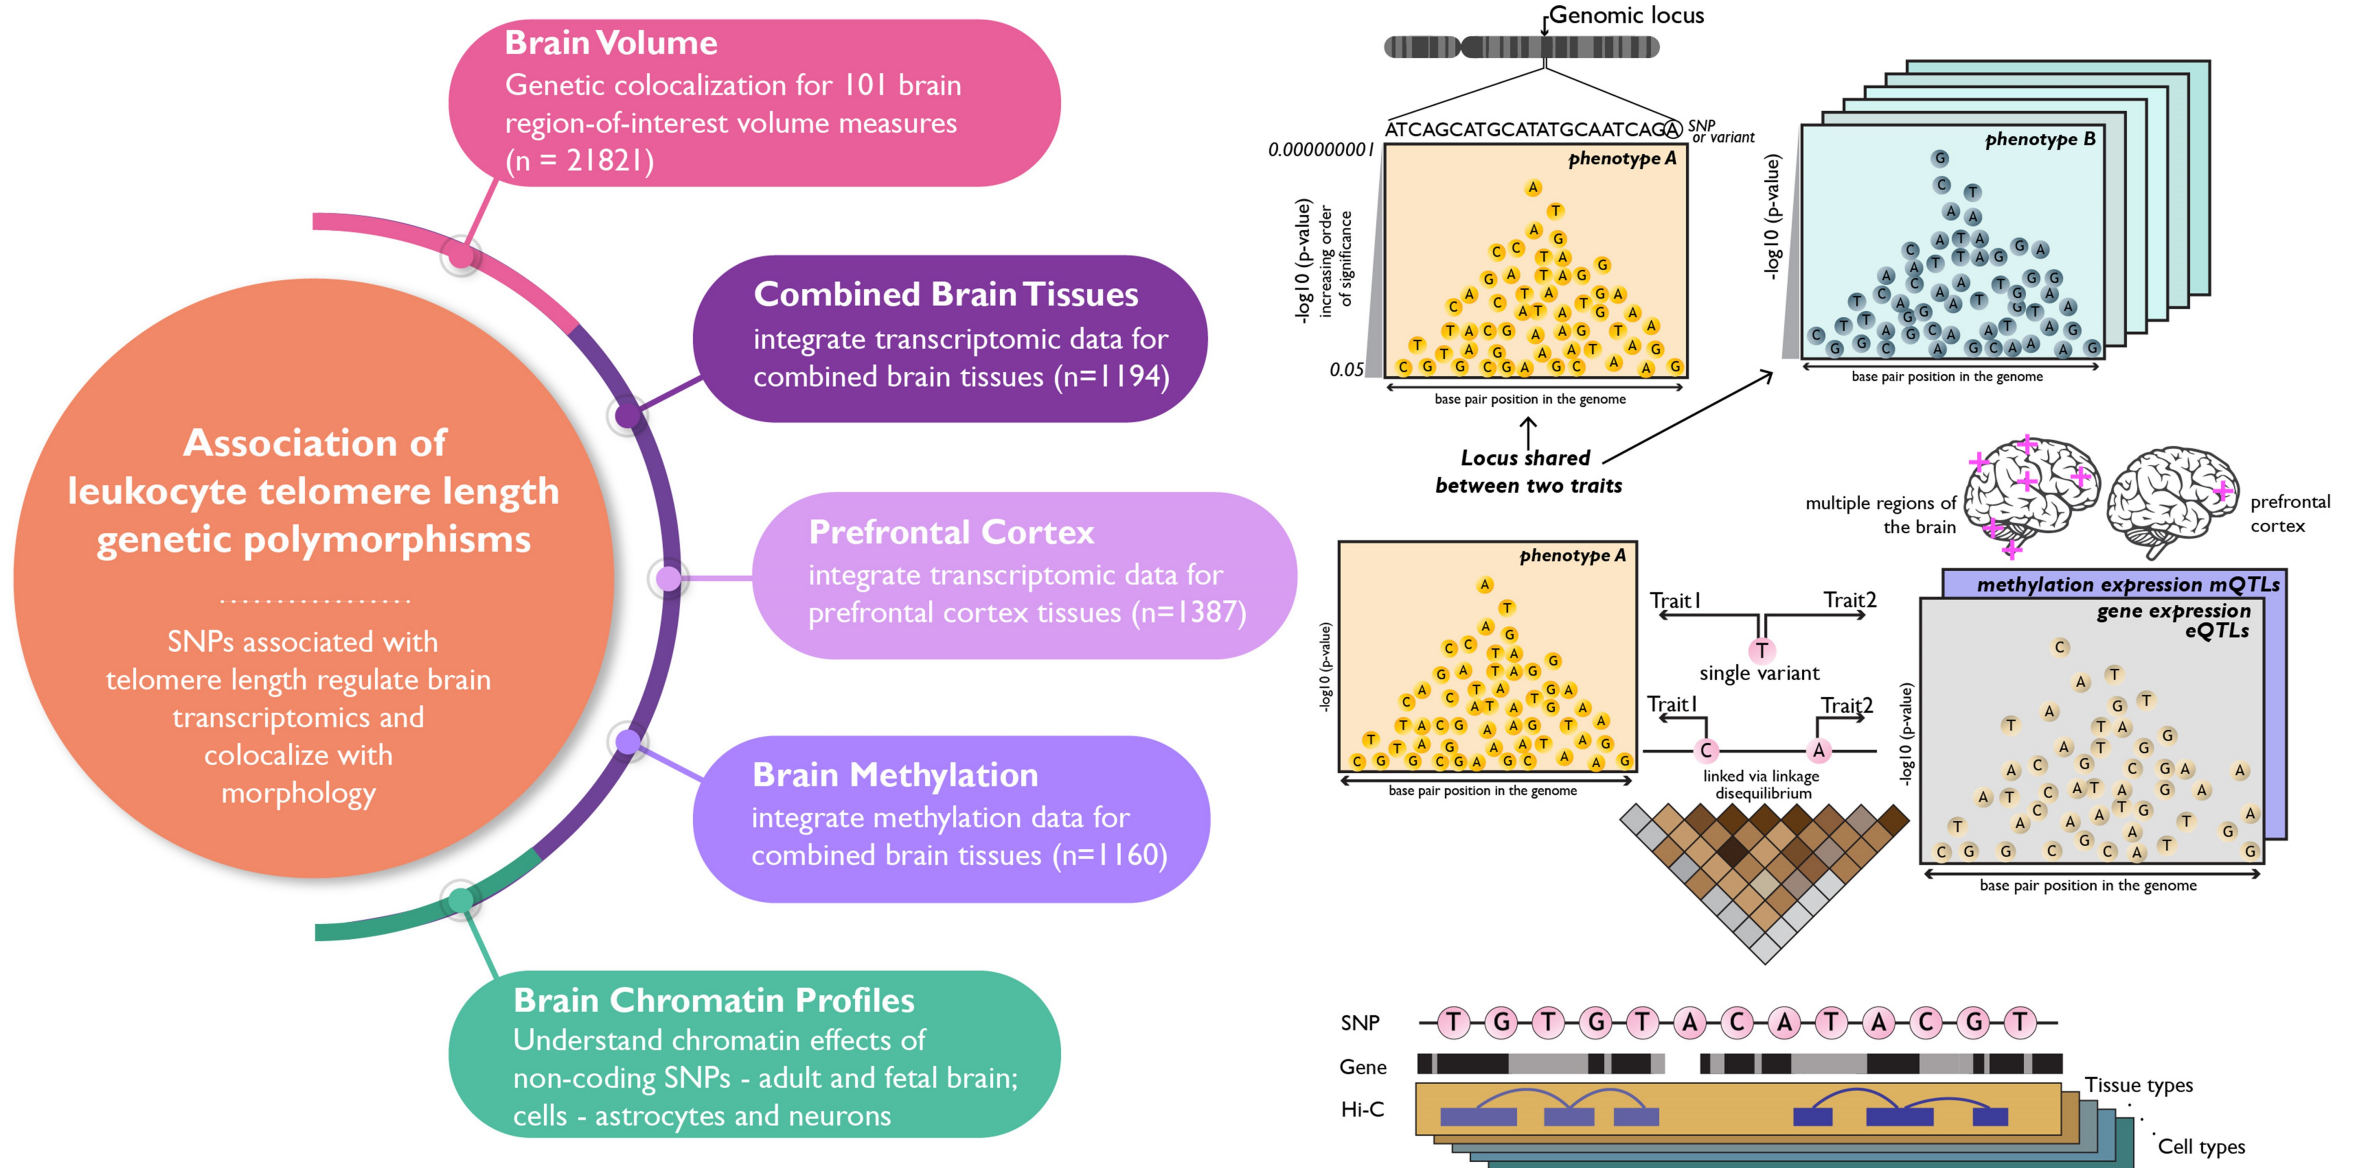

**Figure 1: Study Overview:** Schematic presenting the hypothesis and four major domains studied – i) shared genomic regions between leukocyte telomere length (LTL) and brain volume measures, and gene-based associations for LTL in brain tissue-based ii) transcriptomics – combined brain tissue (meta-analyzed from different regions of the brains) and prefrontal cortex, iii) methylomics – combined brain tissues (meta-analyzed), and iv) Hi-C chromatin profiles – adult and fetal brain, astrocytes and neurons.

## 78 2 RESULTS

### 2.1 Genetic colocalization with brain morphology

80 We performed colocalization analysis using *coloc* (Giambartolomei et al., 2014) between  
LTL and 101 brain volume measures to identify causal genomic loci that with respect to  
82 telomere length and measures of brain morphology. The *coloc* method measures the  
posterior probability for five hypotheses ( $H_0$ - $H_4$ ), where  $H_3$  and  $H_4$  posterior probabilities  
84 (PP) represent sharing two and one genetic variant, respectively. For the EUR population,  
we observed four brain volumes with PP higher than 30%: left postcentral [PP<sub>H3</sub>= 1%,  
86 PP<sub>H4</sub>= 47% ; chr20(q13.33)], left caudal middle frontal [PP<sub>H3</sub>= 1%, PP<sub>H4</sub>= 51%;  
chr20(q13.33)], right precentral [PP<sub>H3</sub>= 73%, PP<sub>H4</sub>= 1%; chr2(p16.2)] and gray matter  
88 [PP<sub>H3</sub>= 99%, PP<sub>H4</sub>= 1% ; chr10(q24.33)]. The top variants associated with both traits in  
this locus [chr10(q24.33)] are rs11191849 and rs11191848, both mapping to *OBFC1*  
90 (alternatively known as *STN1*).

For the EAS population, we found six brain volume measures: gray matter [PP<sub>H3</sub>= 10%,  
92 PP<sub>H4</sub>= 32% ; chr11 (q22.3)]; right cerebellum white matter [PP<sub>H3</sub>=1%, PP<sub>H4</sub> = 42% ; chr10  
(q24 -q25.1)]; right basal forebrain [PP<sub>H3</sub>= 3%, PP<sub>H4</sub> =39% ; chr20 (q13.33)]; cerebellar  
94 vermal lobules I-IV [PP<sub>H3</sub>= 42%, PP<sub>H4</sub> =50%; chr7 (q31.33)]; right supramarginal - [PP<sub>H3</sub>=  
14%, PP<sub>H4</sub> =65% ; chr10 (q24 -q25.1)], and fourth ventricle [PP<sub>H3</sub>= 4%, PP<sub>H4</sub> = 96% ;  
96 chr20 (q13.33)](Figure 2). The strongest PP was seen on chr20 (q13.33) for sharing risk  
variants between LTL and fourth ventricle which is located dorsal to the brain stem and  
98 anterior to the cerebellum, and drains the cerebrospinal fluid (CSF) into the spinal cord  
(Roesch and Tadi, 2020). The top variant in this locus rs7361098 is in the intronic region  
100 of the *RTEL1* (regulator of telomere elongation helicase 1; hg19 and 38) and upstream  
to the *RTEL1-TNFRSF6B*. On chr7 (q31.33), the cerebellar vermal lobules I-IV had high  
102 aggregated probability (92%) of shared genomic risk locus between LTL and volume of  
cerebellar vermal lobule. (Supplementary file 2). The top variants in this locus were

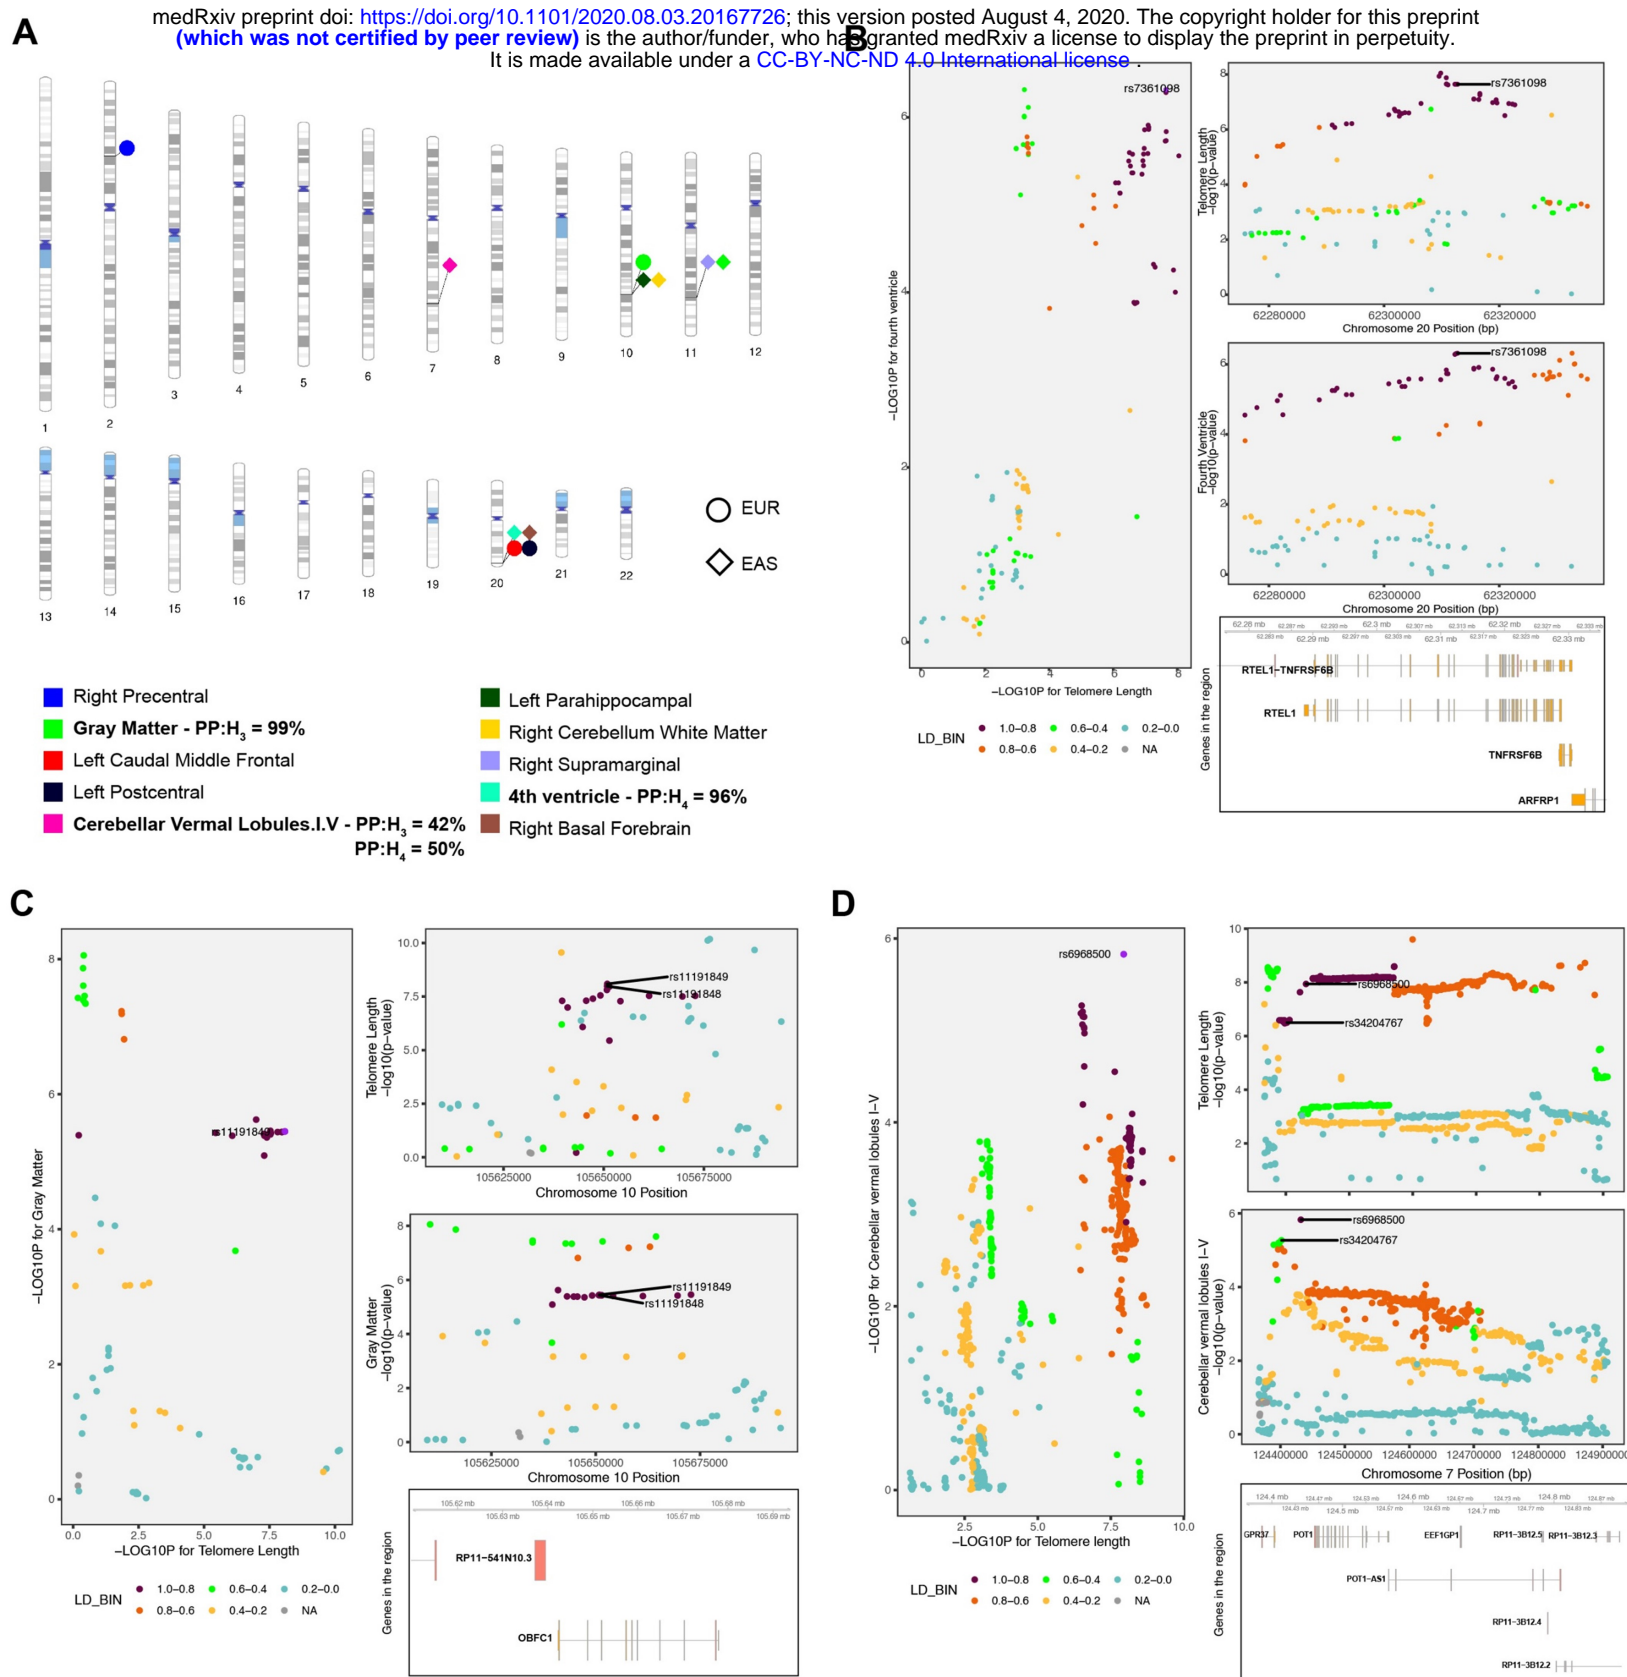



104 rs34204767 in *GPR37* and rs6968500 in *C7orf77* (upstream). The vermal lobules are  
located in the cerebellum midline and affect behavioral and cognitive phenotypes (Yucel  
106 et al., 2013).

## 2.2 Brain tissue based transcriptomic and epigenetic QTLs

108 We integrated expression meta-analyzed cis-QTL data from different tissues of the brain  
(brain<sub>meta</sub>) with SNPs associated with LTL considering allele frequency and LD structure  
110 of the EUR and EAS population separately. For brain<sub>meta</sub> eQTL, we found one bonferroni  
significant gene for the EAS population (*DHRS1*;  $p=1.55 \times 10^{-6}$  and  $p_{\text{HEIDI}} = 1.25 \times 10^{-21}$ ).  
112 None of the genes were bonferroni significant for the EUR population. Significant p-  
value HEIDI test indicates a linkage model i.e. more than one variant that are probably in  
114 linkage, are associated with eQTL and telomere length, whereas non-significant HEIDI p-  
value indicate pleiotropy under single causal variant model (Figure 3A & 3B).

116 Integrating eQTL data from prefrontal cortex (eQTL<sub>pf</sub>), we found five genes - *LRRC34*  
( $p= 1.15 \times 10^{-11}$ ;  $p_{\text{HEIDI}} = 9.64 \times 10^{-4}$ ), RP11-362K14.5 ( $p= 4.38 \times 10^{-10}$ ;  $p_{\text{HEIDI}} = 0.13$ ), *MYNN*  
118 ( $p= 1.11 \times 10^{-9}$ ;  $p_{\text{HEIDI}} = 0.17$ ), RP11-362K14.6 ( $p= 4.67 \times 10^{-7}$   $p_{\text{HEIDI}} = 0.17$ ), and *RP11-*  
*541N10.3* ( $p= 1.18 \times 10^{-6}$ ;  $p_{\text{HEIDI}} = 0.10$ ) in the EUR population. All the significant genes,  
120 except *LRRC34* had a non-significant HEIDI p-value, suggesting pleiotropic variants in  
the risk region sharing association with both eQTL<sub>pf</sub> and LTL. We found three genes  
122 associated in the EAS population; *GPR37* ( $p=9.75 \times 10^{-7}$ ;  $p_{\text{HEIDI}} =0.22$ ), *ATM* ( $p= 1.38 \times 10^{-6}$ ;  
 $p_{\text{HEIDI}} =0.06$ ) and *DHRS1* ( $p= 2.47 \times 10^{-6}$ ;  $p_{\text{HEIDI}} = 1.11 \times 10^{-5}$ ). Genes *GPR37* and *ATM* have  
124 non-significant HEIDI test statistics, suggesting pleiotropy(single-variant) in the region  
(Figure 3C & 3D) (Supplementary file 3).

126 For the brain tissue mQTL data integrated with LTL association statistics, we found 17  
significant CpG sites ( $p \leq 4.54 \times 10^{-7}$ ) in EUR ancestry subjects. Six of the 17 CpG sites  
128 were associated under the pleiotropic model - cg00624418 ( $p_{\text{HEIDI}} =0.82$ ), cg00832555  
( $p_{\text{HEIDI}} =0.06$ ), cg01920524 ( $p_{\text{HEIDI}} =0.27$ ), cg21291985 ( $p_{\text{HEIDI}} =0.22$ ), cg08095637 ( $p_{\text{HEIDI}}$

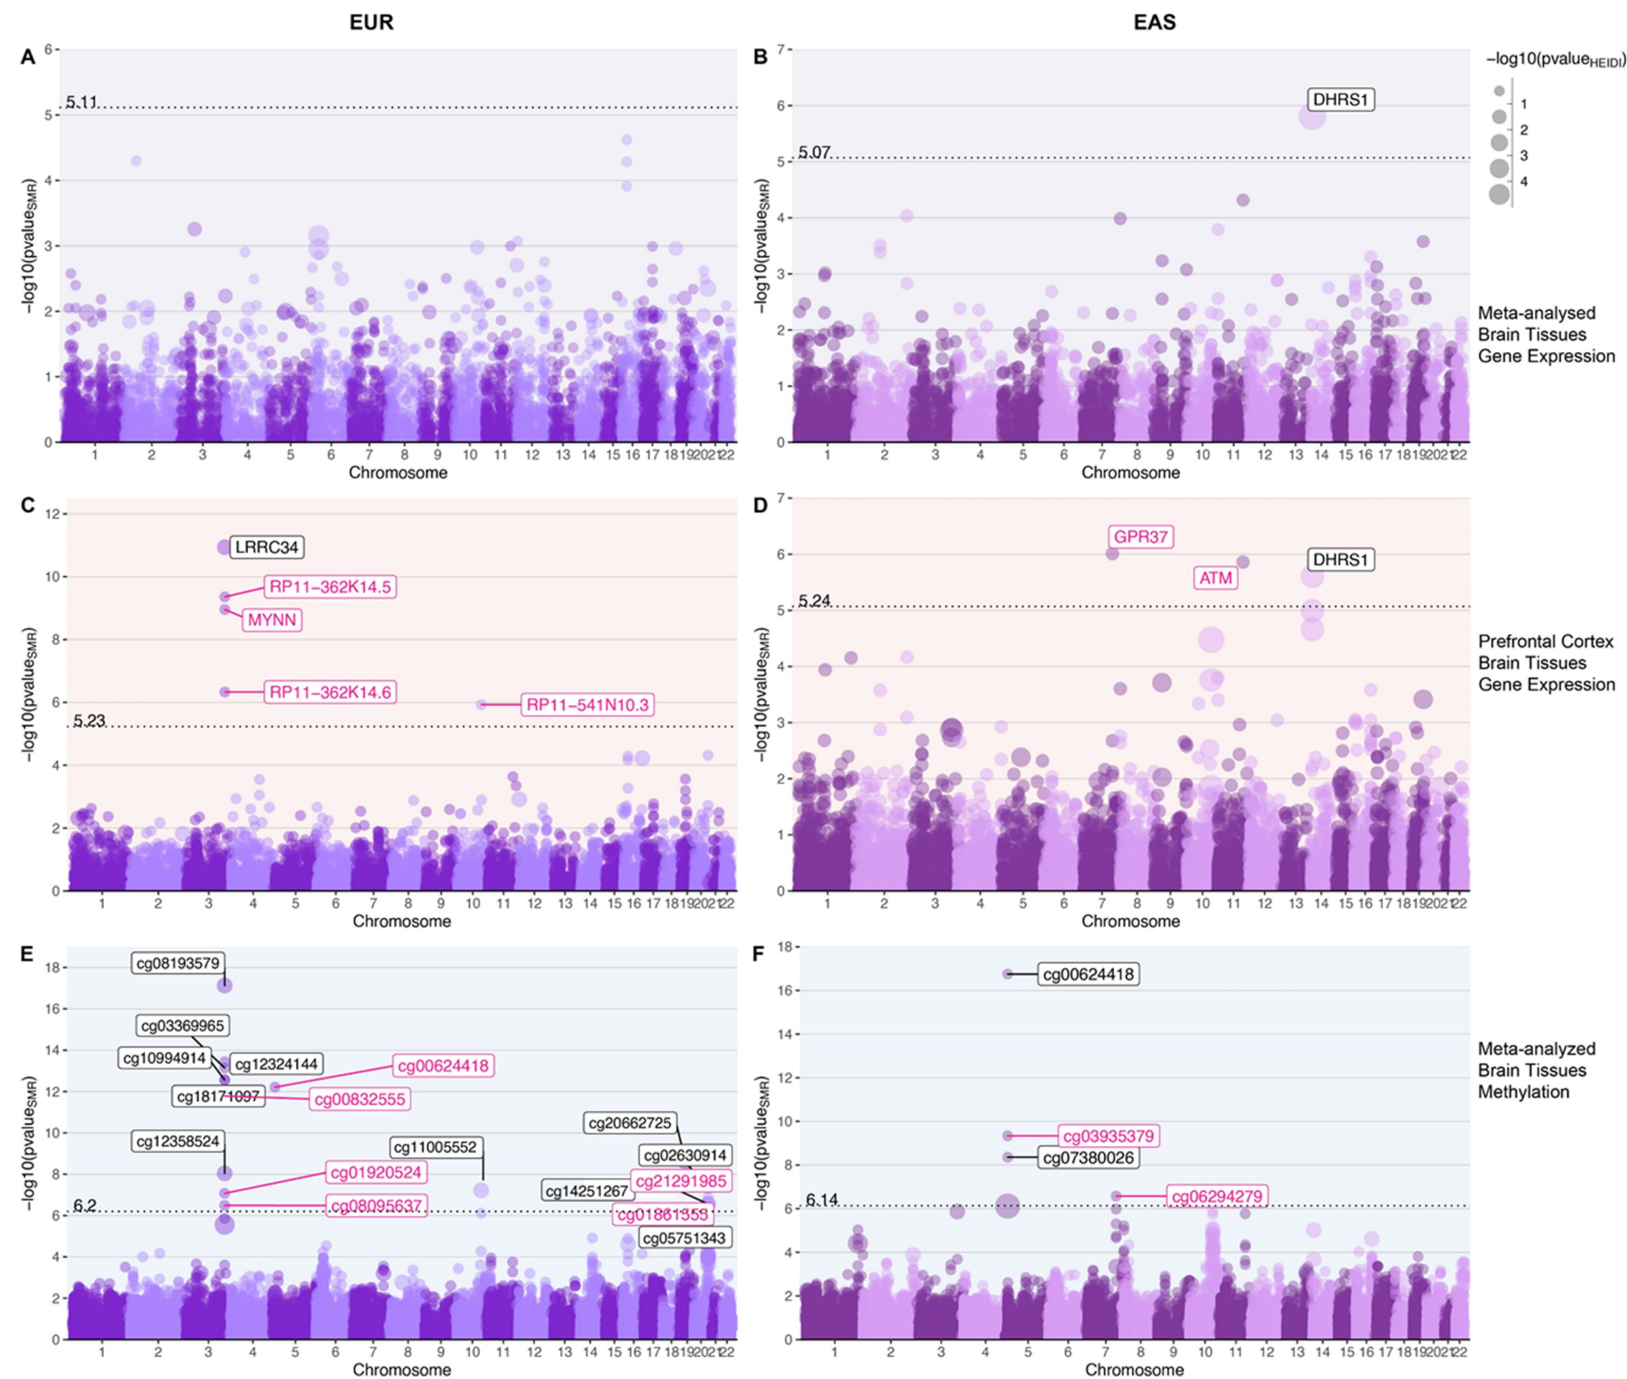

**Figure 3: Gene-based associations integrating brain tissue eQTL and mQTL profiles with genetic variants associated with telomere length in EUR and EAS populations.** A,B) Bokeh plots showing LTL-associated genes for gene expression (eQTLs) of combined brain tissues performed using SMR. C,D) Bokeh plots showing LTL-associated genes for expression in prefrontal cortex E,F) Bokeh plots showing LTL-associated genes for methylation in combined brain tissues. The left side panels show association in EUR population and EAS associations are shown on the right. The x-axis shows genomic coordinate for the gene/CpG sites and the y-axis shows the  $-\log_{10}$  of p-value of SMR test, so the order of increasing significance moves vertically. The dotted line shows the Bonferroni significance and annotated with respective value on top of the line. The size of the dots are scaled to the  $-\log_{10}(\text{p-value})$  of HEIDI test which tests for pleiotropy under single causal variant model defined as  $\text{p-value}_{\text{HEIDI}} > 0.05$  or  $-\log_{10}(\text{p-value}) = 1.3$  highlighted in pink text label. *Note: Bokeh plots are intersection between manhattan and bubble plots.*

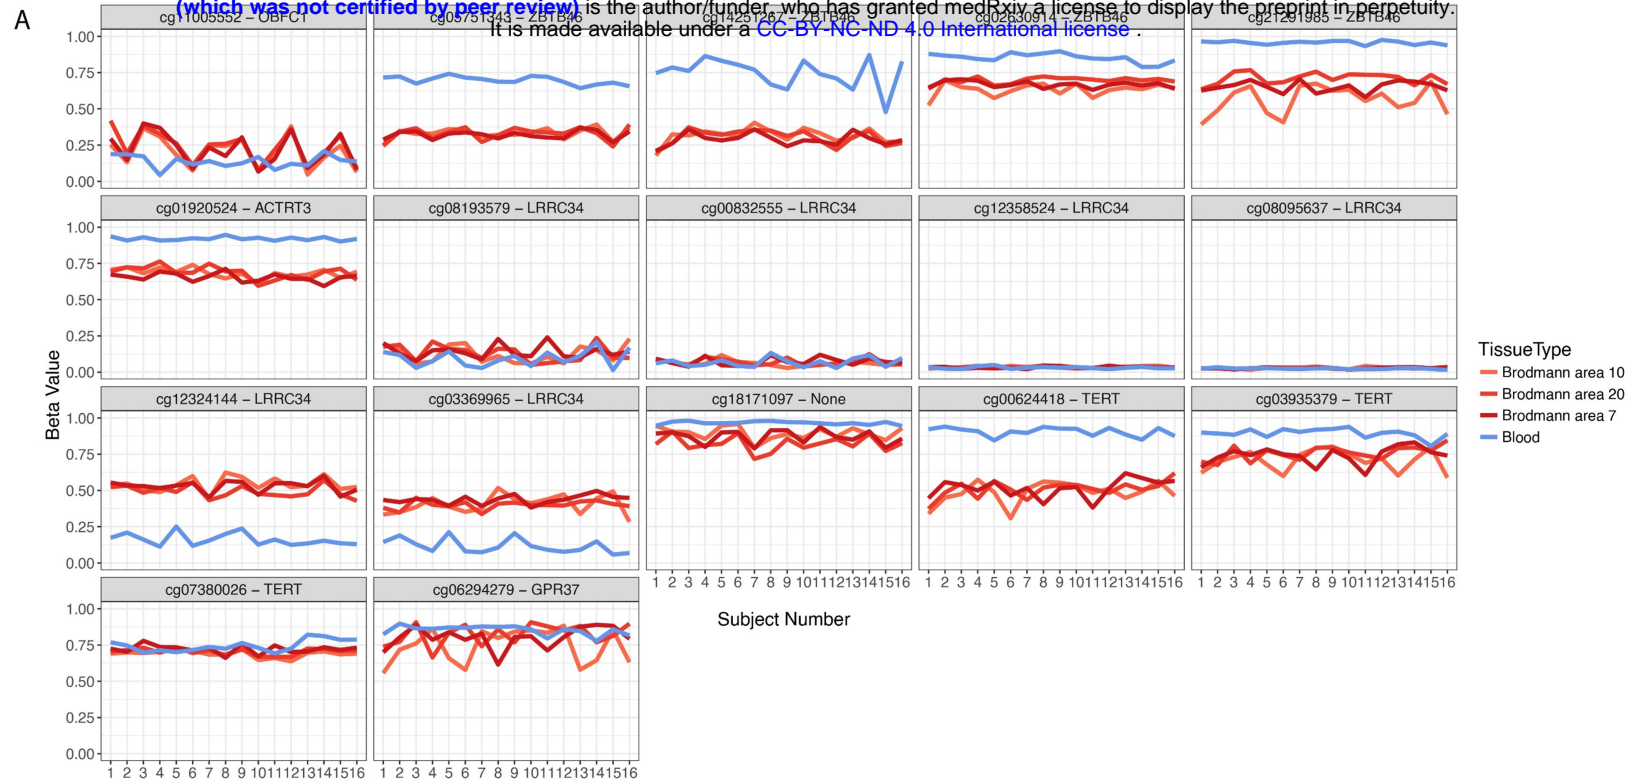

**B**

| Chr        | Coord | Gene(s)   | Gene Region(s) | Variability |      |      |       | Correlation |       |       | Cell Composition |       |      |
|------------|-------|-----------|----------------|-------------|------|------|-------|-------------|-------|-------|------------------|-------|------|
|            |       |           |                | BA10        | BA20 | BA7  | Blood | BA10        | BA20  | BA7   | Blood            | Brain |      |
| cg11005552 | 10    | 105648138 | OBFC1          | intragenic  | 0.27 | 0.28 | 0.28  | 0.09        | 0.14  | 0.21  | 0.29             | 0.02  | 0.04 |
| cg05751343 | 20    | 62405935  | ZBTB46         | intragenic  | 0.09 | 0.12 | 0.06  | 0.06        | 0.13  | -0.23 | -0.58            | 0.02  | 0.01 |
| cg14251267 | 20    | 62406428  | ZBTB46         | intragenic  | 0.09 | 0.12 | 0.11  | 0.22        | 0.53  | 0.46  | 0.27             | 0.06  | 0.01 |
| cg02630914 | 20    | 62436995  | ZBTB46         | promoter    | 0.1  | 0.05 | 0.06  | 0.07        | 0.14  | -0.04 | 0.06             | 0.02  | 0.01 |
| cg21291985 | 20    | 62437035  | ZBTB46         | promoter    | 0.23 | 0.09 | 0.09  | 0.03        | -0.2  | 0.03  | 0.07             | 0     | 0.04 |
| cg01920524 | 3     | 169486878 | ACTRT3         | intragenic  | 0.07 | 0.1  | 0.07  | 0.03        | -0.16 | -0.5  | -0.29            | 0     | 0.02 |
| cg08193579 | 3     | 169529701 | LRRC34         | intragenic  | 0.14 | 0.13 | 0.12  | 0.13        | 0.56  | 0.44  | 0.45             | 0.04  | 0.04 |
| cg00832555 | 3     | 169529716 | LRRC34         | intragenic  | 0.03 | 0.06 | 0.07  | 0.07        | 0.1   | 0.13  | 0.53             | 0.02  | 0.01 |
| cg12358524 | 3     | 169530467 | LRRC34         | promoter    | 0.02 | 0.01 | 0.02  | 0.02        | -0.07 | 0.05  | -0.13            | 0     | 0    |
| cg08095637 | 3     | 169530527 | LRRC34         | promoter    | 0.01 | 0.01 | 0.02  | 0.01        | 0     | -0.17 | 0.26             | 0     | 0    |
| cg12324144 | 3     | 169531663 | LRRC34         | promoter    | 0.11 | 0.1  | 0.1   | 0.1         | 0.22  | -0.18 | 0.4              | 0.02  | 0.01 |
| cg03369965 | 3     | 169531731 | LRRC34         | promoter    | 0.15 | 0.07 | 0.08  | 0.13        | 0.02  | 0.2   | 0.01             | 0.03  | 0.02 |
| cg18171097 | 3     | 169532134 | None           | intergenic  | 0.1  | 0.13 | 0.12  | 0.03        | -0.18 | -0.11 | -0.21            | 0.01  | 0.01 |
| cg00624418 | 5     | 1282357   | TERT           | intragenic  | 0.17 | 0.12 | 0.15  | 0.07        | -0.02 | -0.11 | -0.07            | 0.02  | 0.04 |
| cg03935379 | 5     | 1282703   | TERT           | intragenic  | 0.19 | 0.11 | 0.15  | 0.06        | -0.06 | -0.59 | 0.06             | 0.01  | 0.04 |
| cg07380026 | 5     | 1296007   | TERT           | promoter    | 0.06 | 0.05 | 0.07  | 0.1         | 0.17  | 0.01  | -0.29            | 0.02  | 0    |
| cg06294279 | 7     | 124387056 | GPR37          | intragenic  | 0.28 | 0.16 | 0.18  | 0.07        | 0     | -0.05 | -0.29            | 0.02  | 0.06 |

**Figure 4: CpG site attributes and blood-brain tissue correlation.** To aid in interpretation of the identified CpG sites, we used BECon for visualizing the inter-individual and tissue-based variability. **(Top)** The individual variability across three brain and blood tissue methylation levels is shown in each panel for respective CpG site from BECon data. **(Bottom)** The panel shows genomic location and annotation of the CpG sites and correlation value of blood methylation levels with each of the three brain tissues methylation. Tabular information is listed in Supplementary file 4.

130 =0.14) and cg01861555 ( $p_{\text{HEIDI}} = 0.40$ ). In the EAS population, we found four CpG sites;  
cg00624418 ( $p = 1.77 \times 10^{-17}$ ;  $p_{\text{HEIDI}} = 0.01$ ), cg03935379 ( $p = 4.60 \times 10^{-10}$ ;  $p_{\text{HEIDI}} = 0.09$ ),  
132 cg07380026 ( $p = 4.37 \times 10^{-9}$ ;  $p_{\text{HEIDI}} = 0.01$ ) and cg06294279 ( $p = 2.65 \times 10^{-7}$ ;  $p_{\text{HEIDI}} = 0.35$ ). Of  
these associations, cg03935379 (*TERT*) and cg06294279 (*GPR37*) are associated under  
134 the pleiotropic model (Figure 3E & 3F) (Supplementary file 3). Since methylation studies  
are mostly performed in blood, and methylation levels vary between tissues, we  
136 interpreted the CpG sites in blood and different brain tissues using BECon (Edgar et al.,  
2017) (Supplementary file 4 and Figure 4). Using the EWAS Atlas (Li et al., 2019), we  
138 investigated the eight CpG sites that showed pleiotropy, for their disease-based tissue  
variability of methylation levels (Supplementary file 4).

### 140 **2.3 Brain chromatin association for tissue and cell-types**

We performed association analysis for LTL, by combining Hi-C chromatin SNP-gene  
142 associations for developing brain – fetal brain, dorsolateral prefrontal cortex – adult  
brain, and cell types – astrocytes and neurons using H-MAGMA (Sey et al., 2020). For  
144 fetal brain, we observed 21 genes (EUR) and 50 genes (EAS); adult brain (EUR- 23; EAS-  
53); astrocytes (EUR- 23; EAS – 53); neurons positive [cells sorted as NeuN+] (EUR – 21;  
146 EAS-54) and neurons negative [cells sorted as NeuN-] (EUR-25; EAS-55) (Figure 5).  
Several genes overlapped across tissue and cell types (unique number of genes - EUR=  
148 50, significant genes lower than  $p \leq 1.02 \times 10^{-06}$ ; EAS=97; significant genes lower than  
 $p \leq 9.71 \times 10^{-07}$ ), and their specific distribution is shown in the Venn diagram (Figure 5)  
150 (Supplementary file 5). Combining genes across both populations and considering those  
unique to each tissue and cell type, we found unique genes for fetal brain (eight genes),  
152 adult brain (nine genes), astrocytes (nine genes), neurons ; NeuN+ (11 genes) and  
NeuN- (15 genes) (Table 1). These genes were further investigated for enriched gene  
154 ontology pathways. We observed processes; calcium ion transport ( $p_{\text{FDR}} = 0.012$ ; fetal  
brain) and G2/M cell cycle transition ( $p_{\text{FDR}} = 0.036$ ; adult brain) at  $p_{\text{FDR}} < 0.05$  (Figure 5

156 top-right panel) (Supplementary file5 Table S6 and S7). To further the interpretation, we  
 analyzed these genes using the whole-brain specific protein-protein interaction of all  
 158 unique genes to tissue or cell types. The network was filtered to retain at least two-  
 degrees, meaning that gene (node) should be connected to at least two other genes  
 160 (nodes), to avoid selecting orphan/singular branches. This approach prioritizes genes  
 that interact the most in a given network (Figure 5 bottom-right panel). This network  
 162 revealed 12 intermediate genes that connected our query genes.

164 **Table 1: List of genes unique or non-overlapping among the tissue and cell types.** The genes highlighted in bold drive enrichment results discussed in the main text.

| Fetal Brain                                                                              | Adult Brain                                                                                                                                | Astrocytes                                                                                                                                   | Neurons (Both NeuN cells)                                                                                                                                                                                                                                                                                                                                                                                                                |
|------------------------------------------------------------------------------------------|--------------------------------------------------------------------------------------------------------------------------------------------|----------------------------------------------------------------------------------------------------------------------------------------------|------------------------------------------------------------------------------------------------------------------------------------------------------------------------------------------------------------------------------------------------------------------------------------------------------------------------------------------------------------------------------------------------------------------------------------------|
| <i>RPL22L1, DCAF4, ZNF431</i><br><i>ZNF492, <b>CUL5, JPH4</b></i><br><i>TSSK4, DHRS1</i> | <b><i>PRKCI, SKIL, NPY1R,</i></b><br><b><i>CEP72, CTC-457E21.9,</i></b><br><i>EPHX1, <b>SEC62</b></i><br><b><i>PSME1, RP5-963E22.5</i></b> | <i>RP11-678G14.2, ZNF98,</i><br><i>HAR1B, RP5-963E22.4,</i><br><i>HELZ2, SLC12A7, RP11-</i><br><i>807H17.1, AC005276.1,</i><br><i>BCL2L2</i> | <i>RP11-379K17.4, SRMS,</i><br><i>ACBD3, RP5-1087E8.2,</i><br><i>ZDHHC11, HYALP1</i><br><i>HYAL4,</i><br><i>ENSG00000269042,</i><br><i>ZFHX2,</i><br><i>ENSG00000274002, RP11-</i><br><i>358D14.2, GPR160, RP11-</i><br><i>225H22.4, PAPLN,</i><br><i>ENSG00000283755,</i><br><i>ZNF493, CTD-2561J22.5,</i><br><i>ADCK3, BRD9, WASL,</i><br><i>RP11-420H19.2, TPM4P1,</i><br><i>RP11-416N2.3, ALKBH8,</i><br><i>RP11-708B6.2, COL9A3</i> |

#### 166 2.4 Gene-drug interaction and enrichment of gene functions

We analyzed all significant genes identified from analyses for gene-drug interaction.  
 168 There were 14 genes on whom the drug interaction was available (Table S1 in  
 Supplementary file 6). To connect the influence of these drugs on gene functions we

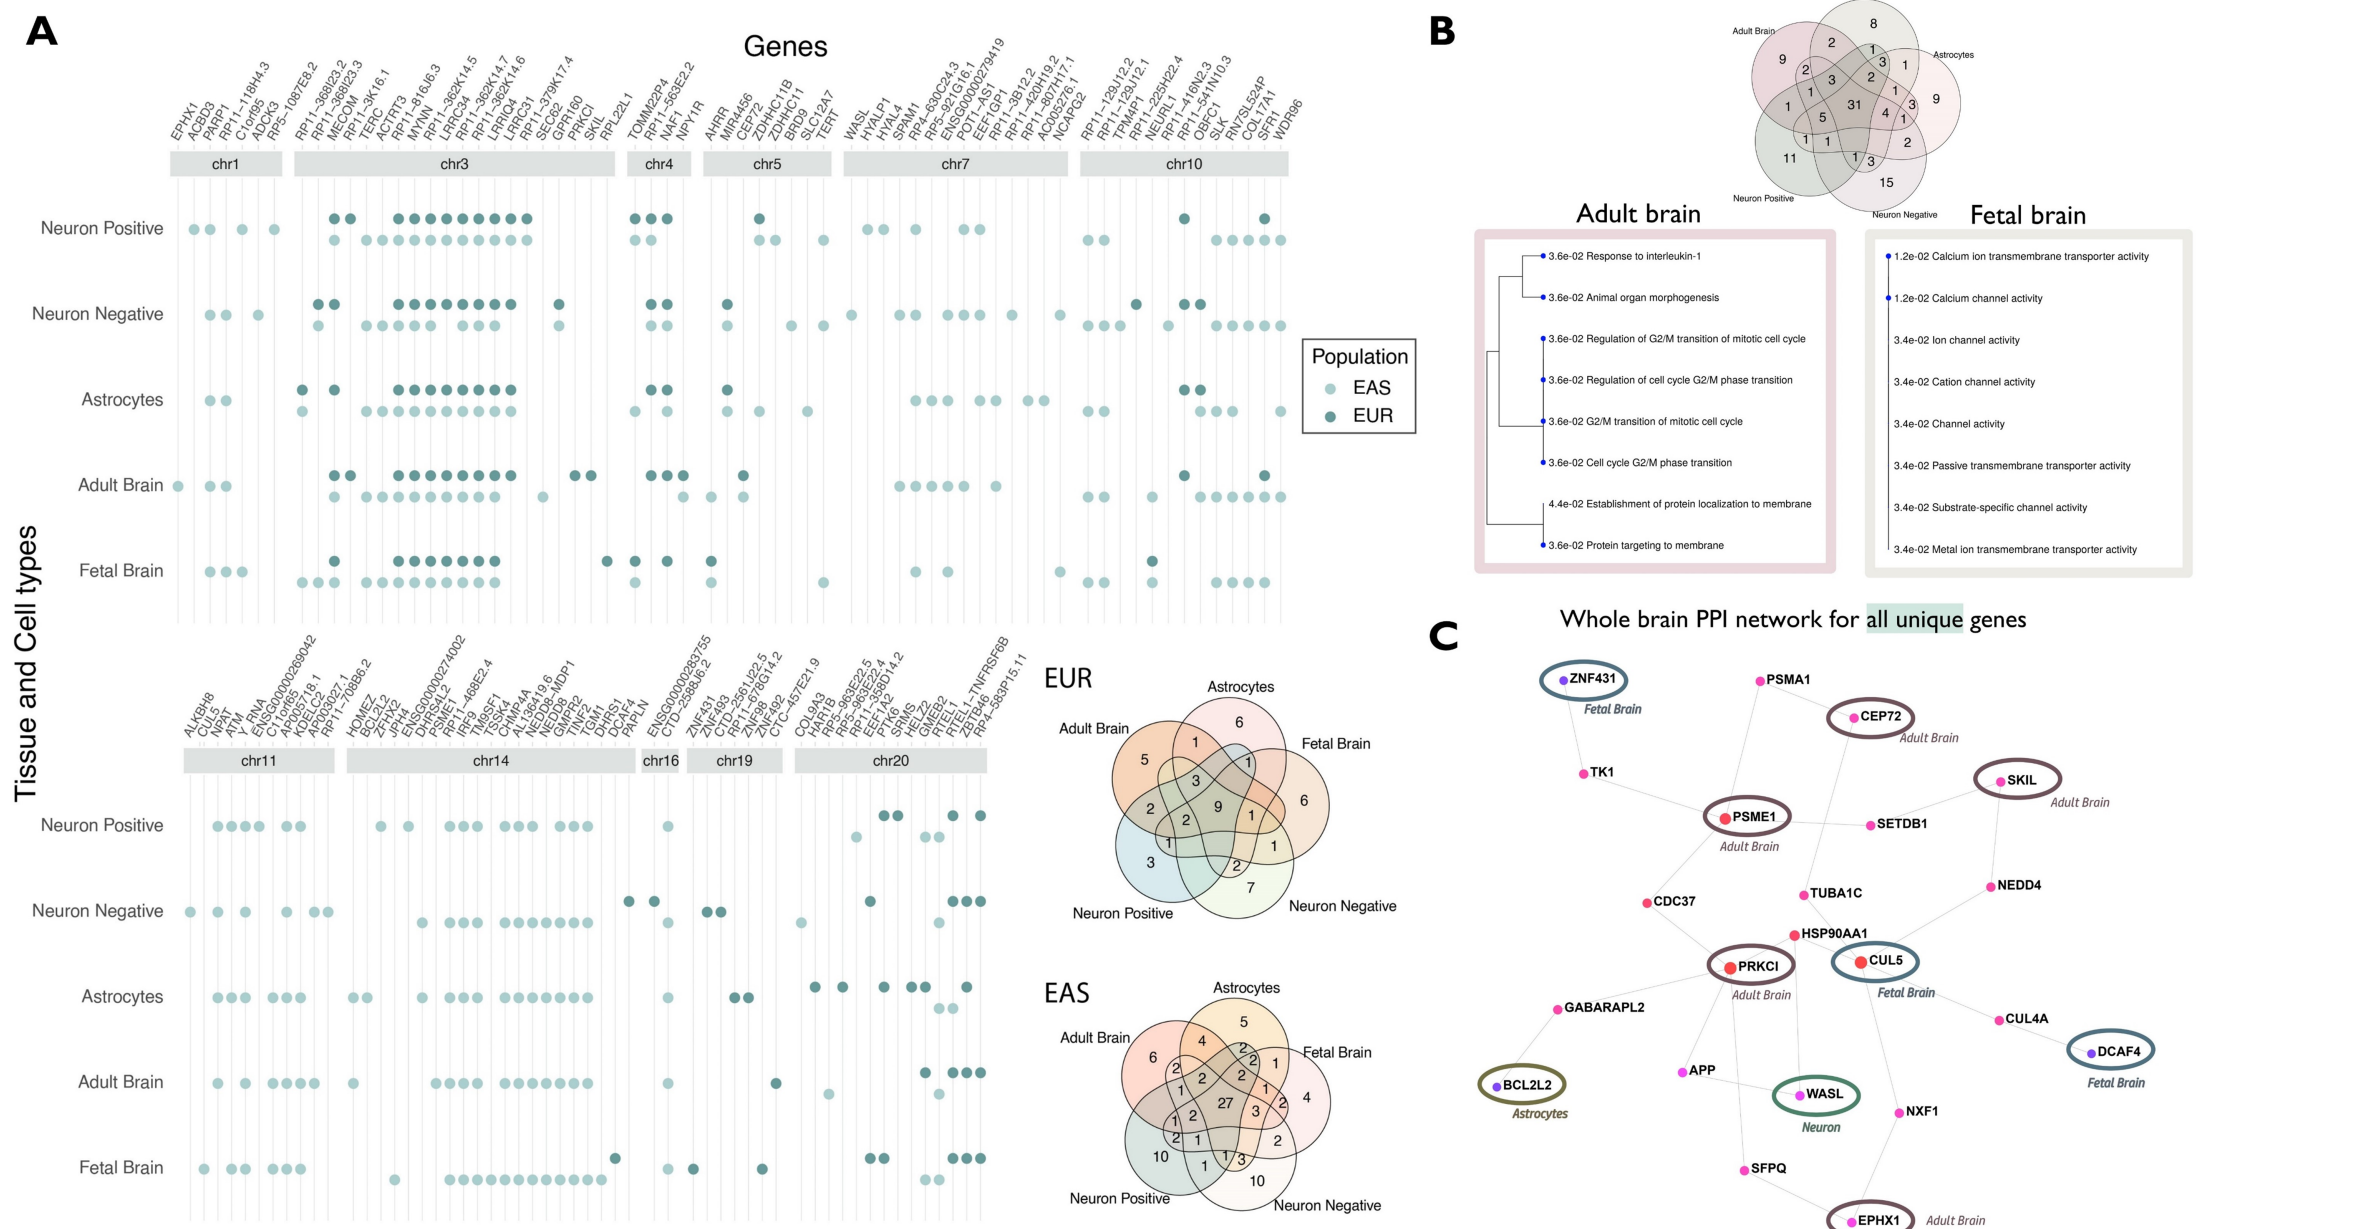

**Figure 5: (A) Genes associated with LTL for tissue (fetal and adult brain) and cells (astrocytes and neurons).** The genes are shown as circle data points categorized by tissue and cell types (x-axis) and arranged by genomic position (ascending position; y-axis). The dark green circles show significant genes for the EUR reference panel and EAS is shown as light green. The Venn diagram on the right shows the distribution of distinct and overlapping genes for each population. Details are provided in Supplementary file 5. The Venn diagram on top right panel shows the distribution of combined significant genes in tissue and cell types. **(B) Gene enrichment analysis of distinct genes.** The genes that were unique to each tissue/cell type were analyzed for gene ontology enrichment. The processes are shown as dendrograms with their  $p_{FDR}$  value on the blue nodes. **(C) PPI network for all tissue/cell-type distinct genes.** The whole-brain specific PPI (protein-protein interaction) network for neuron genes is shown on the right, with query genes circled. Details of gene enrichment are reported in Supplementary file 5 Tables S6 and S7.

170 performed drug set enrichment analysis. Out of 80 drugs, 10 drugs had associated  
information with gene function sets. There were 24 nominally significant ( $p < 0.05$ ) gene  
172 functions processes and one process i.e. transmission across chemical synapses was FDR  
significant ( $p = 0.00028$ ;  $p_{\text{FDR}} = 0.019$ ) (Fig S1 and Table S2 in Supplementary file 6).

### 174 **3 DISCUSSION**

In this study, we investigated the role of genetic variants associated with leukocyte  
176 telomere length (LTL) in the context of brain-based expression, methylation, and  
chromatin profiles of two tissue types and three cell types. Analyzing different brain  
178 morphological traits, we discovered that the volumes of global gray matter, fourth  
ventricle and cerebellar vermal lobules I-IV, have genomic causal loci in common with  
180 LTL. The shared locus with global gray matter reported in our results corroborates  
previous findings of LTL association with cortical gray matter (King et al., 2014). A study  
182 of 15,892 individuals including subjects diagnosed with six psychiatric disorders showed  
gray matter loss across segmental brain regions in comparison to controls (Goodkind et  
184 al., 2015). The fourth ventricle bordered by the brainstem and the cerebellum, is one of  
the sites for CSF production and is the last ventricle connecting to the subarachnoid  
186 space (Roesch and Tadi, 2020). Pathologies involving the fourth ventricle are associated  
with abnormal CSF volume and flow (Whedon and Glassey, 2009). Different  
188 neuropsychiatric disorders such as schizophrenia have demonstrated enlarged fourth  
ventricle – which reflects a deficit in bordering tissue when compared to brain samples  
190 from healthy subjects (Juuhl-Langseth et al., 2012). Schizophrenia also has association  
with reduced telomere length (Russo et al., 2018). Furthermore, an extreme pathology  
192 (i.e. congenital deformity of the fourth ventricle) causes Dandy-Walker malformation  
which exhibits some symptoms with similarities to those seen in schizophrenia,  
194 obsessive compulsive disorder, and type-I and type-II bipolar disorder (Lingeswaran et  
al., 2009). Furthermore, the cerebellar vermal lobules I-IV are the top four anterior lobes

196 connecting both hemispheres of the cerebellum, and are involved in motor, cognitive,  
and behavioral processing in autism spectrum disorders(D'Mello et al., 2015).Taken  
198 together, our results further corroborate the relationship between CNS morphology and  
telomere length.

200 The brain transcriptomic integrated association studies highlighted genes that are  
involved with both LTL and neuronal effects. *GPR37*(G-protein coupled receptor 37) is  
202 expressed in oligodendrocytes in different tissues of the brain contributing to  
myelination regulation (Smith et al., 2017). *GPR37*is associated with telomere length  
204 and serves as stress response neuroprotective gene. In major depression disorder,  
*GPR37* expression levels in brain tissue were lower compared to healthy participants  
206 (Mamdani et al., 2015). Furthermore, CpG site - cg06294279 located in the *GPR37*  
intragenic region was also associated under pleiotropic genomic risk (i.e. sharing  
208 association with both methylation level of the site and telomere length). The top  
variants in the colocalization analysis between LTL and cerebellar vermal lobules overlap  
210 with *GPR37*. The BECon databank shows that Broadman areas 7, 10, and 20 share little  
to low negative correlation with blood-based methylation in healthy individuals. To  
212 understand the role of the CpG site in diseases, we mined the EWAS Datahub (Li et al.,  
2019); CpG site - cg06294279 showed high variability in different brain tissues between  
214 cases and controls, for schizophrenia and Alzheimer's disease (Supplementaryfile4).  
*LRRC34* (leucine rich repeat containing 34) gene expression is high in stem cells which  
216 lowers upon cell differentiation(Lührig et al., 2014). Individuals with Bipolar disorder who  
were on lithium showed changes in SNP-based transcriptome effect of *LRRC34* (Coutts  
218 et al., 2019). Furthermore, we found six CpG sites in the *LRRC34* gene that displayed  
mQTL associations for SNPs associated with LTL, out of which, site- cg08095637 had  
220 single-variant pleiotropic association.



Among genes identified from epigenomic integrated associations, *PARP1* (Poly(ADP-  
222 Ribose) Polymerase 1) is a regulator of DNA repair and cell death taking part in  
neurogenesis of neuronal and embryonic stem cells (Hong et al., 2019). Lowering the  
224 expression levels of *PARP1* is linked with abnormal ventricle volume in the brain and  
exhibits psychiatric symptoms including anxiety, depression, and behavioral impairment  
226 (Hong et al., 2019; Sriram et al., 2016). *ATM* (Ataxia Telangiectasia Mutated) is also  
involved in cellular DNA repair and differentiating pluripotent stem cells (Corti et al.,  
228 2019). *ATM* regulates GABAergic based neuronal plasticity and brain development and  
its dysregulation is associated with onset of different psychopathologies (Pizzamiglio et  
230 al., 2016). The mQTL analysis of brain tissue found CpG sites in addition to *LRRC34*, in  
the *TERT* gene. Methylation based biological age acceleration is associated with *TERT*  
232 and genetic overlap with schizophrenia, bipolar disorder, and dementia (Lu et al., 2018).  
*TERT* is also involved in paternally inherited epigenetic imprint observed in advanced  
234 paternal age which is a risk for several neuropsychiatric disorder (Hehar et al., 2017).  
Methylation levels of *ZBTB46* are associated with cognitive function (Starnawska et al.,  
236 2017) and schizophrenia in a RNA-sequencing gene expression study (Maycox et al.,  
2009; Zhang et al., 2020).

238 By integrating chromatin profiles for brain at two stages of development and different  
cell types, we found several overlapping genes across brain tissue and cell specific  
240 genes. For gene specific to Hi-C associations from fetal brain, we observed calcium ion  
transport process; this enrichment was driven by *JPH4*, and *CUL5*. *JPH4* belongs to the  
242 junctophilin family, is primarily expressed in neurons and regulates calcium signaling in  
normal brain development (Landstrom et al., 2014). *CUL5* (cullin5) encodes the  
244 vasopressin-activated calcium-mobilizing receptor (VACM-1) and is responsible for  
chromosomal stability and DNA repair mechanisms (Tapia-Laliena et al., 2019). Neural  
246 stem cells are precursors of neurons and glial cells in the brain and periodic responses  
from calcium signaling drive cell-specific neurogenesis (Toth et al., 2016). In the adult

248 brain, we observed enrichment of the G2/M cell cycle transition process. While neurons  
are generally not believed to enter M-phase, cell cycle dysregulation arising from  
250 pathological conditions can lead to undifferentiated neurons back in to the cell cycle  
and increase vulnerability to cell death (Walton et al., 2019). Reactivation of the cell cycle  
252 in adult neurons occurs in the circumstance of degeneration or injury to the central  
nervous system(Frade and Ovejero-Benito, 2015). Two genes driving cell cycle ontology  
254 were *EPHX1* and *PSME1*. Both *EPHX1* and *PSME1* are high expressed in the brain, *EPHX1*  
regulates endocannabinoid 2-arachidonoylglycerol in depression, stress, Alzheimer's  
256 disease, and methamphetamine-dependence (Nithipatikom et al., 2014; Václavíková et  
al., 2015). Lower transcript levels of *PSME1* (proteasome activator subunit 1) have been  
258 observed in individuals with major depression disorder compared to healthy/control  
population (Redei et al., 2014).

260 We also observed several brain-based mQTLs which showed pleiotropic (single variant)  
association with LTL SNPs and several genes that were significant when integrating  
262 chromatin profiles. These results are in line with the genomic link between *TERT* and  
accelerated biological aging derived from methylation expression (Lu et al., 2018). The  
264 drug-gene interaction of significant genes showed enrichment for different transporter  
systems of chemical synapses, aquaporins and mitochondrial tRNA aminoacylation and  
266 transmission in the postsynaptic cell (Fig S1: Supplementary file 6). Together, these  
findings indicate the set of LTL-associated genes identified herein are associated with  
268 brain-related traits due to their regulatory effects on brain tissues and cells. Therefore,  
we believe telomere length genomics is an important avenue for future studies of  
270 mental health.

Most significant genes from one population are nominally significant in the other.  
272 However, there were few regions that are significant in one population, but not the  
other. These differences are due to recombination of the SNPs and allele frequency

274 differences in the locus. Five loci on chromosomes 3, 4, 5, 10 and 20 overlap in both  
populations, however, the SNPs in these regions show differences in linkage  
276 disequilibrium highlighting the importance of studying the population based genetic  
association. These differences in SNP-peaks are visualized in genome-wide and regional  
278 plots (Supplementary file 1).

While our study has provided key evidence of shared genomic causal loci among  
280 telomere length, brain morphology, and regulatory traits, it has limitations. The results  
showing genetic co-localizing cannot be interpreted as mediating the direction of  
282 causality. Furthermore, colocalization of two traits under a single variant is a  
conservative model of testing, and there is biological plausibility of more than one  
284 variant exhibiting small effects. There are several SNPs in a locus exhibiting different  
effect directions for LTL and brain volume (Fig S2: Supplementary file 6). Therefore, it is  
286 difficult to assess the phenotypic consequences of each SNP because variants may alter  
physiological states in tissue or cell-type specific manner. We assessed regulatory  
288 changes using two populations and therefore the results may not apply to other major  
populations and will require separate investigation. Further studies using animal models  
290 would narrow targets with specific cellular changes. Our next steps will involve  
investigating the role of telomere length with respect to neuropsychiatric brain-  
292 disorders to deepen the understanding of cellular aging in neurological outcomes.

#### 4 CONCLUSION

294 We identified shared genomic causal loci among those affecting telomere length, brain  
morphology and regulatory traits. The identified genes show involvement in the central  
296 nervous system, and provide evidence that shared genetics could explain, in part, the  
association of LTL with several brain-based outcomes reported previously. These results  
298 highlight that telomere length may serve as a marker for certain brain-based diseases

such as psychiatric disorders. These findings additionally corroborate that in addition to  
300 methylation based biological aging, telomere-based cellular aging has the potential to  
provide further resolution on biological mechanisms of brain disorders.

## 302 **5 METHODS**

All data used in this study were made publicly available by the cited consortia. This  
304 study was exempted from requiring institutional review board approval due to its use of  
de-identified aggregated data.

### 306 **5.1 Cross-ancestry comparison of LTL-associations**

We used the largest available LTL GWAS for EUR and EAS population. There are seven  
308 genome loci in EUR population, and nine independent loci in EAS population associated  
with leukocyte telomere length (LTL) (Dorajoo et al., 2019). Genomic risk regions for LTL  
310 were identified using FUMA (default values; LD -0.6 and 250kb locus) (Watanabe et al.,  
2017). A locus contains several SNPs independent significant SNPs by merging LD  
312 blocks within 250kb. Loci on chromosomes 2 and 19 that are observed in EURs are not  
present in EAS population. Similarly, there are loci specific to EAS population are on  
314 chromosomes 1, 7 and 14. Regions which are positionally similar in both populations are  
on chromosomes 3, 4, 5, 10 and 20. Length of these genomic regions varies by  
316 population due to LD structure and different number of significant variants within these  
regions. Therefore, in this study we investigated pleiotropic associations of SNPs with  
318 LTL and quantitative expression of brain tissues in both populations (Supplementary  
file1).

### 320 **5.2 Brain morphology colocalization**

To evaluate which loci are shared between LTL and brain volume measures, we used the  
322 largest available GWAS of 101 phenotypes of brain morphology (B. Zhao et al., 2019). In  
this study, the brain volume measures or region-of-interest (ROI) were quantified using

324 magnetic resonance imaging and mapped to catalogued ROI to identify (i.e. map them  
to) structural measures (B. Zhao et al., 2019). The GWAS of 101 brain morphology  
326 /region-of-interest measures includes meta-analysis of five cohorts – the Human  
Connectome Project (HCP) study, the Pediatric Imaging, Neurocognition, and Genetics  
328 (PING) study, the Philadelphia Neurodevelopmental Cohort (PNC) study, and the  
Alzheimer's Disease Neuroimaging Initiative (ADNI) study (n=21,821). The GWAS  
330 association statistics for each of the 101 brain morphology measures (B. Zhao et al.,  
2019) were evaluated with respect to GWAS of LTL (Dorajoo et al., 2019) to identify  
332 which causal risk loci were shared across both traits using *coloc* (Giambartolomei et al.,  
2014). We performed pairwise colocalization analysis for each of the risk locus between  
334 LTL and each brain volume phenotypes using the appropriate 1000 Genomes Phase 3  
reference panels (i.e., EUR and EAS). The *coloc* method in R-v3.6, evaluates posterior  
336 probability (PP) for four alternative hypothesis – A) H<sub>1</sub>: association with trait 1, not with  
trait 2, B) H<sub>2</sub>: association with trait 2, not with trait 1, C) H<sub>3</sub>: association with trait 1 and  
338 trait 2, two independent SNPs, and D) H<sub>4</sub>: association with trait 1 and trait 2, one shared  
SNP (Giambartolomei et al., 2014). We used the *coloc.abf* function using p-values,  
340 respective ancestry's allele frequencies and sample size with default priors. Here we  
report results for sharing single causal variant with both traits (LTL and brain  
342 morphology) having H<sub>4</sub> PP higher than 30% in the main text, detailed results can be  
found in supplementary file 2.

### 344 **5.3 Transcriptomic and epigenetic QTLs in brain tissues**

The association of LTL was integrated with eQTL and mQTL information derived from  
346 Genotype-Tissue Expression (GTEx) (GTEx Consortium et al., 2017), CommonMind  
Consortium (CMC) (Fromer et al., 2016), Religious Orders Study and the Memory and  
348 Aging Project (ROSMAP) and PsychENCODE consortia (Gandal et al., 2018). Data were  
included from two transcriptomic studies: a) multiple brain tissue i.e. meta-analysis of

350 gene expression from different regions of the brain (brain<sub>meta</sub>) and b) prefrontal cortex  
(brain<sub>pf</sub>), and methylation association study using meta-analyzed methylation  
352 expression from multiple regions of the brain using Summary-based Mendelian  
Randomization (SMR) (Zhu et al., 2016). Bonferroni correction (0.05/number of  
354 associations) was applied to identify significant gene associations for each of the six QTL  
analysis. We performed heterogeneity in dependent instruments (HEIDI) association  
356 analysis to test if a single variant is associated with phenotype and QTL (single variant  
model of pleiotropy). Significant HEIDI associations ( $p < 0.05$ ) depart from this  
358 assumption of single variant association while non-significant associations ( $p > 0.05$ ) do  
not reject the null, indicating a linkage model (i.e. different SNPs in linkage) (Zhu et al.,  
360 2016). The analyses were performed in each ancestry group (i.e., EUR and EAS)  
separately. Two sets of files were created using LD and SNP allele frequencies of each  
362 population from the 1000 Genome Phase 3 reference panel. This resulted in different  
number of SNPs considered for each population. Misaligned allele direction between  
364 QTL and LTL-SNP dataset were removed. The CpG sites which showed pleiotropic  
evidence i.e. single causal variant between LTL and brain mQTL were interpreted using  
366 BECon for methylation level correlation between brain tissues and blood (Edgar et al.,  
2017) and extracted from EWAS DataHub for different brain disorders (Li et al., 2019).

#### 368 **5.4 Brain chromatin profiles using H-MAGMA**

The gene-based association study for brain-derived chromatin profiles for fetal and  
370 adult brain regions and cells (i.e. astrocytes and neurons) was performed using H-  
MAGMA (Sey et al., 2020). This approach aggregates genetic variants to nearest genes  
372 derived from Hi-C (high-resolution chromatin conformation) data of fetal developing  
cortex, adult dorsolateral prefrontal cortex, and cell-types - iPSC derived astrocytes and  
374 cells sorted as NeuN+ and NeuN- from anterior cingulate cortex (Rajaraman et al., 2018).  
The H-MAGMA approach aids in providing functional/regulatory effects of non-coding

376 SNPs, and is a complementary to transcriptome-wide association studies and the *coloc*  
approach used in this study (Sey et al., 2020). Due to telomeres/TERT's role in the central  
378 nervous system and strong PP seen with brain volume measures, we tested all five tissue  
profiles with LTL GWAS association statistics. Each tissue/cell type association was  
380 performed for EUR and EAS population reference panels. Bonferroni correction  
(0.05/number of associations) was applied to identify gene associations for each the five  
382 tissue/cell type analyses. The genes that were unique to each tissue or cell type were  
analyzed for pathway enrichment using ShinyGO (Ge et al., 2019). Additionally, all  
384 unique genes were investigated for their role in whole-brain specific protein-protein  
interaction network using NetworkAnalyst3.0 (Zhou et al., 2019) retaining genes with at  
386 least two genes. The visualizations were created in ggplot, Gviz and PhenoGram (Wolfe  
et al., 2013). All significant genes from aforementioned analyses were investigated for  
388 gene-drug interactions using DGidb(Griffith et al., 2013). Then analyzed for gene  
function enrichment using DSEA(Napolitano et al., 2016).

## 390 **6 ACKNOWLEDGEMENTS**

This study was supported by the National Institutes of Health (R21 DC018098, R21 DA047527, and F32 MH122058). We would like to acknowledge the participants and the  
393 investigators of all consortia's whose data helped investigate the research question.

## **7 COMPETING INTERESTS**

Drs. Polimanti and Gelernter are paid for their editorial work for the journal 'Complex  
396 Psychiatry'. The other authors have no conflicts of interest to declare.

## **8 DATA AVAILABILITY**

All the data used in this study are publicly available, hosted at the respective consortia  
399 portal. Chinese and European population telomere length GWAS  
(<https://www.nature.com/articles/s41467-019-10443-2#data-availability>); Brain Region  
Phenotypes GWAS (<https://github.com/BIG-S2/GWAS>); eQTL and mQTL data is available  
402 from SMR (<https://cnsgenomics.com/software/smr/#Overview>); H-MAGMA  
(<https://github.com/thewonlab/H-MAGMA> ). The results generated in this study are  
provided in the main text and supplementary files.

405



## 9 REFERENCES

- 408 Aas, M., Elvsåshagen, T., Westlye, L.T., Kaufmann, T., Athanasiu, L., Djurovic, S., Melle, I.,  
van der Meer, D., Martin-Ruiz, C., Steen, N.E., Agartz, I., Andreassen, O.A., 2019.  
Telomere length is associated with childhood trauma in patients with severe  
mental disorders. *Transl. Psychiatry* 9, 97. doi:10.1038/s41398-019-0432-7
- 411 Aas, M., Henry, C., Andreassen, O.A., Bellivier, F., Melle, I., Etain, B., 2016. The role of  
childhood trauma in bipolar disorders. *Int. J. Bipolar Disord.* 4, 2.  
doi:10.1186/s40345-015-0042-0
- 414 Bär, C., Blasco, M.A., 2016. Telomeres and telomerase as therapeutic targets to prevent  
and treat age-related diseases. [version 1; peer review: 4 approved]. *F1000Res.* 5.  
doi:10.12688/f1000research.7020.1
- 417 Cohen, J., Torres, C., 2019. Astrocyte senescence: Evidence and significance. *Aging Cell*  
18, e12937. doi:10.1111/accel.12937
- 420 Corti, A., Sota, R., Dugo, M., Calogero, R.A., Terragni, B., Mantegazza, M., Franceschetti,  
S., Restelli, M., Gasparini, P., Lecis, D., Chrzanowska, K.H., Delia, D., 2019. DNA  
damage and transcriptional regulation in iPSC-derived neurons from Ataxia  
Telangiectasia patients. *Sci. Rep.* 9, 651. doi:10.1038/s41598-018-36912-0
- 423 Coutts, F., Palmos, A.B., Duarte, R.R.R., de Jong, S., Lewis, C.M., Dima, D., Powell, T.R.,  
2019. The polygenic nature of telomere length and the anti-ageing properties of  
lithium. *Neuropsychopharmacology* 44, 757–765. doi:10.1038/s41386-018-0289-0
- 426 D’Mello, A.M., Crocetti, D., Mostofsky, S.H., Stoodley, C.J., 2015. Cerebellar gray matter  
and lobular volumes correlate with core autism symptoms. *Neuroimage Clin.* 7,  
631–639. doi:10.1016/j.nicl.2015.02.007

- 429 Dorajoo, R., Chang, X., Gurung, R.L., Li, Z., Wang, L., Wang, R., Beckman, K.B., Adams-  
Haduch, J., M, Y., Liu, S., Meah, W.Y., Sim, K.S., Lim, S.C., Friedlander, Y., Liu, J., van  
432 Dam, R.M., Yuan, J.-M., Koh, W.-P., Khor, C.C., Heng, C.-K., 2019. Loci for human  
leukocyte telomere length in the Singaporean Chinese population and trans-  
ethnic genetic studies. *Nat. Commun.* 10, 2491. doi:10.1038/s41467-019-10443-2
- Edgar, R.D., Jones, M.J., Meaney, M.J., Turecki, G., Kobor, M.S., 2017. BECon: a tool for  
435 interpreting DNA methylation findings from blood in the context of brain. *Transl.  
Psychiatry* 7, e1187. doi:10.1038/tp.2017.171
- Edlow, A.G., Guedj, F., Sverdlov, D., Pennings, J.L.A., Bianchi, D.W., 2019. Significant  
438 effects of maternal diet during pregnancy on the murine fetal brain transcriptome  
and offspring behavior. *Front. Neurosci.* 13, 1335. doi:10.3389/fnins.2019.01335
- Ferrón, S.R., Marqués-Torrejón, M.A., Mira, H., Flores, I., Taylor, K., Blasco, M.A., Fariñas, I.,  
441 2009. Telomere shortening in neural stem cells disrupts neuronal differentiation  
and neuritogenesis. *J. Neurosci.* 29, 14394–14407. doi:10.1523/JNEUROSCI.3836-  
09.2009
- 444 Forero, D.A., González-Giraldo, Y., López-Quintero, C., Castro-Vega, L.J., Barreto, G.E.,  
Perry, G., 2016. Meta-analysis of Telomere Length in Alzheimer’s Disease. *J.  
Gerontol. A, Biol. Sci. Med. Sci.* 71, 1069–1073. doi:10.1093/gerona/glw053
- 447 Frade, J.M., Ovejero-Benito, M.C., 2015. Neuronal cell cycle: the neuron itself and its  
circumstances. *Cell Cycle* 14, 712–720. doi:10.1080/15384101.2015.1004937
- Fromer, M., Roussos, P., Sieberts, S.K., Johnson, J.S., Kavanagh, D.H., et al., 2016. Gene  
450 expression elucidates functional impact of polygenic risk for schizophrenia. *Nat.  
Neurosci.* 19, 1442–1453. doi:10.1038/nn.4399
- Gandal, M.J., Zhang, P., Hadjimichael, E., Walker, R.L., Chen, C., Liu, S., Won, H., van Bakel,  
453 H., Varghese, M., Wang, Y., Shieh, A.W., Haney, J., Parhami, S., Belmont, J., Kim, M.,

- 456 Moran Losada, P., Khan, Z., Mleczko, J., Xia, Y., Dai, R., Wang, D., Yang, Y.T., Xu, M.,  
Fish, K., Hof, P.R., Warrell, J., Fitzgerald, D., White, K., Jaffe, A.E., PsychENCODE  
Consortium, Peters, M.A., Gerstein, M., Liu, C., Iakoucheva, L.M., Pinto, D.,  
Geschwind, D.H., 2018. Transcriptome-wide isoform-level dysregulation in ASD,  
schizophrenia, and bipolar disorder. *Science* 362. doi:10.1126/science.aat8127
- 459 Ge, S.X., Jung, D., Yao, R., 2019. ShinyGO: a graphical enrichment tool for animals and  
plants. *Bioinformatics*. doi:10.1093/bioinformatics/btz931
- 462 Giambartolomei, C., Vukcevic, D., Schadt, E.E., Franke, L., Hingorani, A.D., Wallace, C.,  
Plagnol, V., 2014. Bayesian test for colocalisation between pairs of genetic  
association studies using summary statistics. *PLoS Genet.* 10, e1004383.  
doi:10.1371/journal.pgen.1004383
- 465 Giral, H., Landmesser, U., Kratzer, A., 2018. Into the Wild: GWAS Exploration of Non-  
coding RNAs. *Front. Cardiovasc. Med.* 5, 181. doi:10.3389/fcvm.2018.00181
- 468 Goodkind, M., Eickhoff, S.B., Oathes, D.J., Jiang, Y., Chang, A., Jones-Hagata, L.B., Ortega,  
B.N., Zaiko, Y.V., Roach, E.L., Korgaonkar, M.S., Grieve, S.M., Galatzer-Levy, I., Fox,  
P.T., Etkin, A., 2015. Identification of a common neurobiological substrate for  
mental illness. *JAMA Psychiatry* 72, 305–315.  
471 doi:10.1001/jamapsychiatry.2014.2206
- 474 Griffith, M., Griffith, O.L., Coffman, A.C., Weible, J.V., McMichael, J.F., Spies, N.C., Koval, J.,  
Das, I., Callaway, M.B., Eldred, J.M., Miller, C.A., Subramanian, J., Govindan, R.,  
Kumar, R.D., Bose, R., Ding, L., Walker, J.R., Larson, D.E., Dooling, D.J., Smith, S.M.,  
Ley, T.J., Mardis, E.R., Wilson, R.K., 2013. DGIdb: mining the druggable genome.  
*Nat. Methods* 10, 1209–1210. doi:10.1038/nmeth.2689
- 477 GTEx Consortium, Laboratory, Data Analysis & Coordinating Center (LDACC)—Analysis  
Working Group, Statistical Methods groups—Analysis Working Group, Enhancing

480 GTE<sub>x</sub> (eGTE<sub>x</sub>) groups, NIH Common Fund, NIH/NCI, NIH/NHGRI, NIH/NIMH,  
NIH/NIDA, Biospecimen Collection Source Site—NDRI, Biospecimen Collection  
Source Site—RPCI, Biospecimen Core Resource—VARI, Brain Bank Repository—  
483 University of Miami Brain Endowment Bank, Leidos Biomedical—Project  
Management, ELSI Study, Genome Browser Data Integration & Visualization—EBI,  
Genome Browser Data Integration & Visualization—UCSC Genomics Institute,  
486 University of California Santa Cruz, Lead analysts:, Laboratory, Data Analysis  
& Coordinating Center (LDACC):, NIH program management:, Biospecimen  
collection:, Pathology:, eQTL manuscript working group:, Battle, A., Brown, C.D.,  
Engelhardt, B.E., Montgomery, S.B., 2017. Genetic effects on gene expression  
489 across human tissues. *Nature* 550, 204–213. doi:10.1038/nature24277

Hehar, H., Ma, I., Mychasiuk, R., 2017. Intergenerational Transmission of Paternal  
Epigenetic Marks: Mechanisms Influencing Susceptibility to Post-Concussion  
492 Symptomology in a Rodent Model. *Sci. Rep.* 7, 7171. doi:10.1038/s41598-017-  
07784-7

Henje Blom, E., Han, L.K.M., Connolly, C.G., Ho, T.C., Lin, J., LeWinn, K.Z., Simmons, A.N.,  
495 Sacchet, M.D., Mobayed, N., Luna, M.E., Paulus, M., Epel, E.S., Blackburn, E.H.,  
Wolkowitz, O.M., Yang, T.T., 2015. Peripheral telomere length and hippocampal  
volume in adolescents with major depressive disorder. *Transl. Psychiatry* 5, e676.  
498 doi:10.1038/tp.2015.172

Hong, S., Yi, J.H., Lee, S., Park, C.-H., Ryu, J.H., Shin, K.S., Kang, S.J., 2019. Defective  
neurogenesis and schizophrenia-like behavior in PARP-1-deficient mice. *Cell*  
501 *Death Dis.* 10, 943. doi:10.1038/s41419-019-2174-0

Juuhl-Langseth, M., Rimol, L.M., Rasmussen, I.A., Thormodsen, R., Holmén, A., Emblem,  
K.E., Due-Tønnessen, P., Rund, B.R., Agartz, I., 2012. Comprehensive segmentation

- 504 of subcortical brain volumes in early onset schizophrenia reveals limited structural  
abnormalities. *Psychiatry Res.* 203, 14–23. doi:10.1016/j.psychresns.2011.10.005
- Kaczmarczyk, M., Wingenfeld, K., Kuehl, L.K., Otte, C., Hinkelmann, K., 2018. Childhood  
507 trauma and diagnosis of major depression: Association with memory and  
executive function. *Psychiatry Res.* 270, 880–886.  
doi:10.1016/j.psychres.2018.10.071
- 510 Kananen, L., Surakka, I., Pirkola, S., Suvisaari, J., Lönnqvist, J., Peltonen, L., Ripatti, S.,  
Hovatta, I., 2010. Childhood adversities are associated with shorter telomere  
length at adult age both in individuals with an anxiety disorder and controls. *PLoS*  
513 *One* 5, e10826. doi:10.1371/journal.pone.0010826
- King, K.S., Kozlitina, J., Rosenberg, R.N., Peshock, R.M., McColl, R.W., Garcia, C.K., 2014.  
Effect of leukocyte telomere length on total and regional brain volumes in a large  
516 population-based cohort. *JAMA Neurol.* 71, 1247–1254.  
doi:10.1001/jamaneurol.2014.1926
- Koliada, A.K., Krasnenkov, D.S., Vaiserman, A.M., 2015. Telomeric aging: mitotic clock or  
519 stress indicator? *Front. Genet.* 6, 82. doi:10.3389/fgene.2015.00082
- Landstrom, A.P., Beavers, D.L., Wehrens, X.H.T., 2014. The junctophilin family of proteins:  
from bench to bedside. *Trends Mol. Med.* 20, 353–362.  
522 doi:10.1016/j.molmed.2014.02.004
- Li, M., Zou, D., Li, Z., Gao, R., Sang, J., Zhang, Y., Li, R., Xia, L., Zhang, T., Niu, G., Bao, Y.,  
Zhang, Z., 2019. EWAS Atlas: a curated knowledgebase of epigenome-wide  
525 association studies. *Nucleic Acids Res.* 47, D983–D988. doi:10.1093/nar/gky1027
- Lingeswaran, A., Barathi, D., Sharma, G., 2009. Dandy-Walker variant associated with  
bipolar affective disorder. *J. Pediatr. Neurosci.* 4, 131–132. doi:10.4103/1817-  
528 1745.57341

- Liu, M.-Y., Nemes, A., Zhou, Q.-G., 2018. The emerging roles for telomerase in the central nervous system. *Front. Mol. Neurosci.* 11, 160. doi:10.3389/fnmol.2018.00160
- 531 Lobanova, A., She, R., Pieraut, S., Clapp, C., Maximov, A., Denchi, E.L., 2017. Different requirements of functional telomeres in neural stem cells and terminally differentiated neurons. *Genes Dev.* 31, 639–647. doi:10.1101/gad.295402.116
- 534 Lu, A.T., Xue, L., Salfati, E.L., Chen, B.H., Ferrucci, L., Levy, D., Joehanes, R., Murabito, J.M., Kiel, D.P., Tsai, P.-C., Yet, I., Bell, J.T., Mangino, M., Tanaka, T., McRae, A.F., Marioni, R.E., Visscher, P.M., Wray, N.R., Deary, I.J., Levine, M.E., Quach, A., Assimes, T., Tsao, P.S., Absher, D., Stewart, J.D., Li, Y., Reiner, A.P., Hou, L., Baccarelli, A.A., Whitsel, E.A., Aviv, A., Cardona, A., Day, F.R., Wareham, N.J., Perry, J.R.B., Ong, K.K., Raj, K., Lunetta, K.L., Horvath, S., 2018. GWAS of epigenetic aging rates in blood reveals a  
537 critical role for TERT. *Nat. Commun.* 9, 387. doi:10.1038/s41467-017-02697-5
- 540 Lührig, S., Siamishi, I., Tesmer-Wolf, M., Zechner, U., Engel, W., Nolte, J., 2014. *Lrrc34*, a novel nucleolar protein, interacts with *npm1* and *ncl* and has an impact on  
543 pluripotent stem cells. *Stem Cells Dev.* 23, 2862–2874. doi:10.1089/scd.2013.0470
- Mamdani, F., Rollins, B., Morgan, L., Myers, R.M., Barchas, J.D., Schatzberg, A.F., Watson, S.J., Akil, H., Potkin, S.G., Bunney, W.E., Vawter, M.P., Sequeira, P.A., 2015. Variable  
546 telomere length across post-mortem human brain regions and specific reduction in the hippocampus of major depressive disorder. *Transl. Psychiatry* 5, e636. doi:10.1038/tp.2015.134
- 549 Maycox, P.R., Kelly, F., Taylor, A., Bates, S., Reid, J., Logendra, R., Barnes, M.R., Larminie, C., Jones, N., Lennon, M., Davies, C., Hagan, J.J., Scorer, C.A., Angelinetta, C., Akbar, M.T., Hirsch, S., Mortimer, A.M., Barnes, T.R.E., de Bellerocche, J., 2009. Analysis of  
552 gene expression in two large schizophrenia cohorts identifies multiple changes

associated with nerve terminal function. *Mol. Psychiatry* 14, 1083–1094.

doi:10.1038/mp.2009.18

555 McLaughlin, K.A., Greif Green, J., Gruber, M.J., Sampson, N.A., Zaslavsky, A.M., Kessler,  
R.C., 2012. Childhood adversities and first onset of psychiatric disorders in a  
national sample of US adolescents. *Arch. Gen. Psychiatry* 69, 1151–1160.

558 doi:10.1001/archgenpsychiatry.2011.2277

McLaughlin, K.A., Koenen, K.C., Bromet, E.J., Karam, E.G., Liu, H., Petukhova, M., Ruscio,  
A.M., Sampson, N.A., Stein, D.J., Aguilar-Gaxiola, S., Alonso, J., Borges, G.,

561 Demyttenaere, K., Dinolova, R.V., Ferry, F., Florescu, S., de Girolamo, G., Gureje, O.,  
Kawakami, N., Lee, S., Navarro-Mateu, F., Piazza, M., Pennell, B.-E., Posada-Villa, J.,  
Ten Have, M., Viana, M.C., Kessler, R.C., 2017. Childhood adversities and post-

564 traumatic stress disorder: evidence for stress sensitisation in the World Mental  
Health Surveys. *Br. J. Psychiatry* 211, 280–288. doi:10.1192/bjp.bp.116.197640

Muneer, A., Minhas, F.A., 2019. Telomere biology in mood disorders: an updated,

567 comprehensive review of the literature. *Clin. Psychopharmacol. Neurosci.* 17, 343–  
363. doi:10.9758/cpn.2019.17.3.343

Napolitano, F., Sirci, F., Carrella, D., di Bernardo, D., 2016. Drug-set enrichment analysis: a  
570 novel tool to investigate drug mode of action. *Bioinformatics* 32, 235–241.

doi:10.1093/bioinformatics/btv536

Ng, B., White, C.C., Klein, H.-U., Sieberts, S.K., McCabe, C., Patrick, E., Xu, J., Yu, L., Gaiteri,  
573 C., Bennett, D.A., Mostafavi, S., De Jager, P.L., 2017. An xQTL map integrates the  
genetic architecture of the human brain's transcriptome and epigenome. *Nat.*

*Neurosci.* 20, 1418–1426. doi:10.1038/nn.4632

- 576 Nithipatikom, K., Endsley, M.P., Pfeiffer, A.W., Falck, J.R., Campbell, W.B., 2014. A novel activity of microsomal epoxide hydrolase: metabolism of the endocannabinoid 2-arachidonoylglycerol. *J. Lipid Res.* 55, 2093–2102. doi:10.1194/jlr.M051284
- 579 Pizzamiglio, L., Focchi, E., Murru, L., Tamborini, M., Passafaro, M., Menna, E., Matteoli, M., Antonucci, F., 2016. New role of ATM in controlling gabaergic tone during development. *Cereb. Cortex* 26, 3879–3888. doi:10.1093/cercor/bhw125
- 582 Puhlmann, L.M.C., Valk, S.L., Engert, V., Bernhardt, B.C., Lin, J., Epel, E.S., Vrticka, P., Singer, T., 2019. Association of Short-term Change in Leukocyte Telomere Length With Cortical Thickness and Outcomes of Mental Training Among Healthy Adults: A  
585 Randomized Clinical Trial. *JAMA Netw. Open* 2, e199687.  
doi:10.1001/jamanetworkopen.2019.9687
- 588 Qi, T., Wu, Y., Zeng, J., Zhang, F., Xue, A., Jiang, L., Zhu, Z., Kemper, K., Yengo, L., Zheng, Z., eQTLGen Consortium, Marioni, R.E., Montgomery, G.W., Deary, I.J., Wray, N.R., Visscher, P.M., McRae, A.F., Yang, J., 2018. Identifying gene targets for brain-related traits using transcriptomic and methylomic data from blood. *Nat. Commun.* 9, 2282. doi:10.1038/s41467-018-04558-1
- 591 Rajarajan, P., Borrman, T., Liao, W., Schrode, N., Flaherty, E., Casiño, C., Powell, S., Yashaswini, C., LaMarca, E.A., Kassim, B., Javidfar, B., Espeso-Gil, S., Li, A., Won, H.,  
594 Geschwind, D.H., Ho, S.-M., MacDonald, M., Hoffman, G.E., Roussos, P., Zhang, B., Hahn, C.-G., Weng, Z., Brennand, K.J., Akbarian, S., 2018. Neuron-specific signatures in the chromosomal connectome associated with schizophrenia risk.  
597 *Science* 362. doi:10.1126/science.aat4311
- Redei, E.E., Andrus, B.M., Kwasny, M.J., Seok, J., Cai, X., Ho, J., Mohr, D.C., 2014. Blood transcriptomic biomarkers in adult primary care patients with major depressive



- 600 disorder undergoing cognitive behavioral therapy. *Transl. Psychiatry* 4, e442.  
doi:10.1038/tp.2014.66
- Roesch, Z.K., Tadi, P., 2020. Neuroanatomy, Fourth Ventricle, in: StatPearls. StatPearls  
603 Publishing, Treasure Island (FL).
- Russo, P., Prinzi, G., Proietti, S., Lamonaca, P., Frustaci, A., Boccia, S., Amore, R., Lorenzi,  
M., Onder, G., Marzetti, E., Valdiglesias, V., Guadagni, F., Valente, M.G., Cascio,  
606 G.L., Fraietta, S., Ducci, G., Bonassi, S., 2018. Shorter telomere length in  
schizophrenia: Evidence from a real-world population and meta-analysis of most  
recent literature. *Schizophr. Res.* 202, 37–45. doi:10.1016/j.schres.2018.07.015
- 609 Sey, N.Y.A., Hu, B., Mah, W., Fauni, H., McAfee, J.C., Rajarajan, P., Brennand, K.J., Akbarian,  
S., Won, H., 2020. A computational tool (H-MAGMA) for improved prediction of  
brain-disorder risk genes by incorporating brain chromatin interaction profiles.  
612 *Nat. Neurosci.* 23, 583–593. doi:10.1038/s41593-020-0603-0
- Smith, B.M., Giddens, M.M., Neil, J., Owino, S., Nguyen, T.T., Duong, D., Li, F., Hall, R.A.,  
2017. Mice lacking Gpr37 exhibit decreased expression of the myelin-associated  
615 glycoprotein MAG and increased susceptibility to demyelination. *Neuroscience*  
358, 49–57. doi:10.1016/j.neuroscience.2017.06.006
- Sriram, C.S., Jangra, A., Gurjar, S.S., Mohan, P., Bezbaruah, B.K., 2016. Edaravone  
618 abrogates LPS-induced behavioral anomalies, neuroinflammation and PARP-1.  
*Physiol. Behav.* 154, 135–144. doi:10.1016/j.physbeh.2015.10.029
- Starnawska, A., Tan, Q., McGue, M., Mors, O., Børghlum, A.D., Christensen, K., Nyegaard,  
621 M., Christiansen, L., 2017. Epigenome-Wide Association Study of Cognitive  
Functioning in Middle-Aged Monozygotic Twins. *Front. Aging Neurosci.* 9, 413.  
doi:10.3389/fnagi.2017.00413

- 624 Szebeni, A., Szebeni, K., DiPeri, T., Chandley, M.J., Crawford, J.D., Stockmeier, C.A.,  
Ordway, G.A., 2014. Shortened telomere length in white matter oligodendrocytes  
in major depression: potential role of oxidative stress. *Int. J.*  
627 *Neuropsychopharmacol.* 17, 1579–1589. doi:10.1017/S1461145714000698
- Tapia-Laliena, M.Á., Korzeniewski, N., Peña-Llopis, S., Scholl, C., Fröhling, S.,  
Hohenfellner, M., Duensing, A., Duensing, S., 2019. Cullin 5 is a novel candidate  
630 tumor suppressor in renal cell carcinoma involved in the maintenance of genome  
stability. *Oncogenesis* 8, 4. doi:10.1038/s41389-018-0110-2
- Toth, A.B., Shum, A.K., Prakriya, M., 2016. Regulation of neurogenesis by calcium  
633 signaling. *Cell Calcium* 59, 124–134. doi:10.1016/j.ceca.2016.02.011
- Václavíková, R., Hughes, D.J., Souček, P., 2015. Microsomal epoxide hydrolase 1 (EPHX1):  
Gene, structure, function, and role in human disease. *Gene* 571, 1–8.  
636 doi:10.1016/j.gene.2015.07.071
- Vakonaki, E., Tsiminikaki, K., Plaitis, S., Fragkiadaki, P., Tsoukalas, D., Katsikantami, I., Vaki,  
G., Tzatzarakis, M.N., Spandidos, D.A., Tsatsakis, A.M., 2018. Common mental  
639 disorders and association with telomere length. *Biomed. Rep.* 8, 111–116.  
doi:10.3892/br.2018.1040
- Walton, C.C., Zhang, W., Patiño-Parrado, I., Barrio-Alonso, E., Garrido, J.-J., Frade, J.M.,  
642 2019. Primary neurons can enter M-phase. *Sci. Rep.* 9, 4594. doi:10.1038/s41598-  
019-40462-4
- Wang, X., Sundquist, K., Hedelius, A., Palmér, K., Memon, A.A., Sundquist, J., 2017.  
645 Leukocyte telomere length and depression, anxiety and stress and adjustment  
disorders in primary health care patients. *BMC Psychiatry* 17, 148.  
doi:10.1186/s12888-017-1308-0

- 648 Watanabe, K., Taskesen, E., van Bochoven, A., Posthuma, D., 2017. Functional mapping and annotation of genetic associations with FUMA. *Nat. Commun.* 8, 1826. doi:10.1038/s41467-017-01261-5
- 651 Whedon, J.M., Glassey, D., 2009. Cerebrospinal fluid stasis and its clinical significance. *Altern Ther Health Med* 15, 54–60.
- 654 Wolfe, D., Dudek, S., Ritchie, M.D., Pendergrass, S.A., 2013. Visualizing genomic information across chromosomes with PhenoGram. *BioData Min* 6, 18. doi:10.1186/1756-0381-6-18
- 657 Yucel, K., Nazarov, A., Taylor, V.H., Macdonald, K., Hall, G.B., Macqueen, G.M., 2013. Cerebellar vermis volume in major depressive disorder. *Brain Struct. Funct.* 218, 851–858. doi:10.1007/s00429-012-0433-2
- 660 Zhang, Y., You, X., Li, S., Long, Q., Zhu, Y., Teng, Z., Zeng, Y., 2020. Peripheral Blood Leukocyte RNA-Seq Identifies a Set of Genes Related to Abnormal Psychomotor Behavior Characteristics in Patients with Schizophrenia. *Med. Sci. Monit.* 26, e922426. doi:10.12659/MSM.922426
- 663 Zhao, B., Luo, T., Li, T., Li, Y., Zhang, J., Shan, Y., Wang, X., Yang, L., Zhou, F., Zhu, Z., Alzheimer's Disease Neuroimaging Initiative, Pediatric Imaging, Neurocognition and Genetics, Zhu, H., 2019. Genome-wide association analysis of 19,629 individuals identifies variants influencing regional brain volumes and refines their genetic co-architecture with cognitive and mental health traits. *Nat. Genet.* 51, 1637–1644. doi:10.1038/s41588-019-0516-6
- 669 Zhao, T., Hu, Y., Zang, T., Wang, Y., 2019. Integrate GWAS, eQTL, and mQTL Data to Identify Alzheimer's Disease-Related Genes. *Front. Genet.* 10, 1021. doi:10.3389/fgene.2019.01021

- 672 Zhou, G., Soufan, O., Ewald, J., Hancock, R.E.W., Basu, N., Xia, J., 2019. NetworkAnalyst  
3.0: a visual analytics platform for comprehensive gene expression profiling and  
meta-analysis. *Nucleic Acids Res.* 47, W234–W241. doi:10.1093/nar/gkz240
- 675 Zhou, Q.-G., Liu, M.-Y., Lee, H.-W., Ishikawa, F., Devkota, S., Shen, X.-R., Jin, Xin, Wu, H.-Y.,  
Liu, Z., Liu, X., Jin, Xun, Zhou, H.-H., Ro, E.J., Zhang, J., Zhang, Y., Lin, Y.-H., Suh, H.,  
Zhu, D.-Y., 2017. Hippocampal TERT Regulates Spatial Memory Formation  
678 through Modulation of Neural Development. *Stem Cell Rep.* 9, 543–556.  
doi:10.1016/j.stemcr.2017.06.014
- Zhu, Z., Zhang, F., Hu, H., Bakshi, A., Robinson, M.R., Powell, J.E., Montgomery, G.W.,  
681 Goddard, M.E., Wray, N.R., Visscher, P.M., Yang, J., 2016. Integration of summary  
data from GWAS and eQTL studies predicts complex trait gene targets. *Nat.*  
*Genet.* 48, 481–487. doi:10.1038/ng.3538

684

## 10 FIGURE CAPTIONS

- 687
- **Figure 1: Study Overview:** Schematic presenting the hypothesis and four major domains studied – i) shared genomic regions between leukocyte telomere length (LTL) and brain volume measures, and gene-based associations for LTL in brain tissue-based ii) transcriptomics – combined brain tissue (meta-analyzed from different regions of the brains) and prefrontal cortex, iii) methylomics – combined brain tissues (meta-analyzed), and iv) Hi-C chromatin profiles – adult and fetal brain, astrocytes and neurons.
- 690
- **Figure 2: Genetic colocalization** A) The ideogram highlights genomic regions wherein genetic variants (SNPs) are shared between leukocyte telomere length (LTL) and respective brain volume measures whose PP >30%. Posterior probability >90% of sharing a causal variants for each LTL-brain volume measure pair is bolded. B) Regional association plot for LTL and fourth ventricle on chr20 (q13.33) and the top significant variants for both traits in the locus is shown followed by genes in the region (hg19 build). C) Regional association plot for LTL and gray matter on chr10 (q24.33) and the top significant variants for both traits in the locus is shown followed by genes in the region ( hg19 build). D) Regional association plot for both traits on chr7 (q31.33) and the top two most significant variants in the locus are shown followed by genes in the region (hg19 build).
- 696
- 699
- 702
- **Figure 3: Gene-based associations integrating brain tissue eQTL and mQTL profiles** with genetic variants associated with telomere length in EUR and EAS populations. A,B) Bokeh plots showing LTL-associated genes for gene expression (eQTLs) of combined brain tissues performed using SMR. C,D) Bokeh plots showing LTL-associated genes for expression in prefrontal cortex E,F) Bokeh plots showing LTL-associated genes for methylation in combined brain tissues. The left side panels show association in EUR population and EAS associations are shown on the right. The x-axis shows genomic coordinate for the gene/CpG sites and the y-axis shows the  $-\log_{10}$  of p-value of SMR test, so the order of increasing significance moves vertically. The dotted line shows the Bonferroni significance and annotated with respective value on top of the line. The size of the dots are scaled to the  $-\log_{10}$ (p-value) of HEIDI test which tests for pleiotropy under single causal variant model defined as  $p\text{-value}_{\text{HEIDI}} > 0.05$  or  $-\log_{10}(p\text{-value}) = 1.3$  highlighted in pink text label.. Note: Bokeh plots are intersection between manhattan and bubble plots.
- 705
- 708
- 711
- 714
- 717

- 720
- **Figure 4: CpG site attributes and blood-brain tissue correlation.** To aid in interpretation of the identified CpG sites, we used BECon for visualizing the inter-individual and tissue-based variability. (Top) The individual variability across three brain and blood tissue methylation levels is shown in each panel for respective CpG site from BECon data. (Bottom) The panel shows genomic location and annotation of the CpG sites and correlation value of blood methylation levels with each of the three brain tissues methylation. Tabular information is listed in Supplementary file 4.
- 723
- 726
- **Figure 5:** (A) Genes associated with LTL for tissue (fetal and adult brain) and cells (astrocytes and neurons). The genes are shown as circle data points categorized by tissue and cell types (x-axis) and arranged by genomic position (ascending position; y-axis). The dark green circles show significant genes for the EUR reference panel and EAS is shown as light green. The venn diagram on the right shows the distribution of distinct and overlapping genes for each population. Details are provided in Supplementary file 5. The Venn diagram on top right panel shows the distribution of combined significant genes in tissue and cell types. (B) Gene enrichment analysis of distinct genes. The genes that were unique to each tissue/cell type were analyzed for gene ontology enrichment. The processes are shown as dendograms with their pFDR value on the blue nodes. (C) PPI network for all tissue/cell-type distinct genes. The whole-brain specific PPI (protein-protein interaction) network for neuron genes is shown on the right, with query genes circled. Details of gene enrichment are reported in Supplementary file5 Tables S6 and S7.
- 729
- 732
- 735
- 738
- 741

## 11 SUPPLEMENTARY FILES

- 744
- **Supplementaryfile1.pdf:** Genome-wide and regional plots of LTL-GWAS in EUR and EAS population showing annotation of CADD scores, RegulomeDB, regulatory sites, and HiC chromatin interactions
- 747
- **Supplementaryfile2.xlsx:** Details of genetic colocalization between leukocyte telomere length (LTL) of EUR and EAS populations with 101 brain morphology measures
- 750
- Table S1: Genomic locus in each population and corresponding five posterior probability values for each region reported in the manuscript
  - Table S2: Legend of brain volume measures analyzed with LTL

- 753 ○ Table S3: Details of posterior probability values for all brain regions for Region1 (chr2:54461744-54498311) of EUR population
- 756 ○ Table S4: Details of posterior probability values for all brain regions for Region2 (chr3:169392323-169599567) of EUR population
- 759 ○ Table S5: Details of posterior probability values for all brain regions for Region3 (chr4:164001945-164126538) of EUR population
- 762 ○ Table S6: Details of posterior probability values for all brain regions for Region4 (chr5:1279790-1355859) of EUR population
- 765 ○ Table S7: Details of posterior probability values for all brain regions for Region5 (chr10:105608838-105694301) of EUR population
- 768 ○ Table S8: Details of posterior probability values for all brain regions for Region6 (chr19:22089575-22319421) of EUR population
- 771 ○ Table S9: Details of posterior probability values for all brain regions for Region7 (chr20:62421622-62467796) of EUR population
- 774 ○ Table S10: Details of posterior probability values for all brain regions for Region1 (chr1:226376883-226653478) of EAS population
- 777 ○ Table S11: Details of posterior probability values for all brain regions for Region2 (chr3:169360327-169582223) of EAS population
- 780 ○ Table S12: Details of posterior probability values for all brain regions for Region3 (chr4:164007820-164126538) of EAS population
- 783 ○ Table S13: Details of posterior probability values for all brain regions for Region4 (chr5:1276050-1343794) of EAS population
- 786 ○ Table S14: Details of posterior probability values for all brain regions for Region5 (chr7:124366188-124907090) of EAS population
- Table S15: Details of posterior probability values for all brain regions for Region6 (chr10:105671683-105801818) of EAS population
- Table S16: Details of posterior probability values for all brain regions for Region7 (chr11:107983015-108367453) of EAS population
- Table S17: Details of posterior probability values for all brain regions for Region8 (chr14:24623428-24730100) of EAS population
- Table S18: Details of posterior probability values for all brain regions for Region9 (chr20:62275844-62335293) of EAS population
- **Supplementaryfile3.pdf**: Details of significant LTL associations for eQTL (gene expression) of meta-analyzed brain tissues and prefrontal cortex, and mQTL associations of meta-analyzed brain tissues in each population. Comparative

789 results of all significant associations from one population are shown in other  
population as well.

- 792 • **Supplementaryfile4.pdf**: Visualization of mQTL sites that showed evidence of  
pleiotropy (single variant model from non-significant p-value HEIDI) were mined  
from EWAS DataHub in EWAS Atlas to show tissue-based variability in  
neuropsychiatric phenotypes
- 795 • **Supplementaryfile5.xlsx**: Details of chromatin-profiles associations for tissue  
and cell types in EUR and EAS population
  - 798 ○ Table S1: List of significant genes in fetal brain tissue for LTL associations  
in EUR and EAS population. Comparative results of all significant  
associations from one population are shown in other population as well.
  - 801 ○ Table S2: List of significant genes in adult brain tissue for LTL associations  
in EUR and EAS population. Comparative results of all significant  
associations from one population are shown in other population as well.
  - 804 ○ Table S3: List of significant genes in astrocyte cell types for LTL  
associations in EUR and EAS population. Comparative results of all  
significant associations from one population are shown in other  
population as well.
  - 807 ○ Table S4: List of significant genes in positive neurons cell types for LTL  
associations in EUR and EAS population. Comparative results of all  
significant associations from one population are shown in other  
population as well.
  - 810 ○ Table S5: List of significant genes in negative neuron cell type for LTL  
associations in EUR and EAS population. Comparative results of all  
significant associations from one population are shown in other  
population as well.
  - 813 ○ Table S6: List of genes that were distinct/non-overlapping in each tissue  
and cell-types and gene ontology enrichment results are shown next to  
the respective list of genes.
  - 816 ○ Table S7: Gene ontology enrichment results of the network from unique  
genes shown in Figure 6 (right panel).
  - 819 ○ Table S8: List of Bonferroni thresholds for each tissue and cell type in both  
populations and the number of significant associations.
- 822 • **Supplementary file 6**. Details of gene-drug interaction, drug set enrichment and  
effect direction of SNPs in the loci that are colocalized



- Table S1: Gene-Drug interaction mined from The Drug-Gene interaction database
- 825 ○ Fig S1. Drug Enrichment Set Analysis (DSEA). Analyzing enriched gene functions for drugs identified from drug-gene interaction (as shown above)
- 828 ○ Table S2: Tabular associations of DSEA shown in the above figure
- Fig S2: Effect direction of SNPs in the shared causal region for LTL and brain volume measures

831
